# Supplementary material for: Effect of EGLN1 Genetic Polymorphisms on Hemoglobin Concentration in Andean Highlanders
Source: Hindawi journal article supplement (doi:10.1155/2020/3436581), 2020-01-01
Supplement: f1 [file 3436581.f1.pdf]

**Table S1.** Genotype data for *EGLN1* SNPs in each individual

| Cohort | ID <sup>a</sup> | SNP1 <sup>b</sup> | SNP2 <sup>b</sup> | SNP3 <sup>b</sup> | SNP4 <sup>b</sup> | Cohort  | ID <sup>a</sup> | SNP1 <sup>b</sup> | SNP2 <sup>b</sup> | SNP3 <sup>b</sup> | SNP4 <sup>b</sup> |
|--------|-----------------|-------------------|-------------------|-------------------|-------------------|---------|-----------------|-------------------|-------------------|-------------------|-------------------|
| La Paz | BLV001          | T T               | G A               | C C               | G G               | El Alto | BLV051          | T T               | G G               | C G               | G A               |
| La Paz | BLV002          | T C               | G A               | C C               | G A               | El Alto | BLV052          | T C               | G A               | C G               | G A               |
| La Paz | BLV003          | T T               | A A               | C C               | G G               | El Alto | BLV053          | T T               | G A               | C G               | G A               |
| La Paz | BLV004          | T C               | A A               | C G               | G A               | El Alto | BLV054          | T T               | G G               | C G               | G A               |
| La Paz | BLV005          | T T               | G G               | C C               | G G               | El Alto | BLV055          | T T               | G G               | C C               | G G               |
| La Paz | BLV006          | T C               | G A               | C G               | G A               | El Alto | BLV056          | T C               | G A               | C G               | G A               |
| La Paz | BLV007          | T T               | G G               | C G               | G A               | El Alto | BLV057          | T T               | G G               | C C               | G G               |
| La Paz | BLV008          | T C               | G A               | C C               | G A               | El Alto | BLV058          | T T               | A A               | C C               | G G               |
| La Paz | BLV009          | T T               | G G               | C G               | G A               | El Alto | BLV059          | T C               | G A               | C C               | G A               |
| La Paz | BLV010          | T T               | G A               | C C               | G A               | El Alto | BLV060          | T T               | G G               | C C               | G A               |
| La Paz | BLV011          | T T               | G A               | C C               | G A               | El Alto | BLV061          | T C               | A A               | C C               | G A               |
| La Paz | BLV012          | T T               | G G               | C G               | A A               | El Alto | BLV062          | T C               | G A               | C C               | G A               |
| La Paz | BLV013          | T T               | G G               | C C               | G G               | El Alto | BLV063          | T C               | G A               | C C               | G A               |
| La Paz | BLV014          | C C               | A A               | G G               | A A               | El Alto | BLV064          | T C               | G A               | C C               | G A               |
| La Paz | BLV015          | T T               | G A               | C C               | G A               | El Alto | BLV065          | T T               | G G               | C C               | G G               |
| La Paz | BLV016          | T T               | G A               | C C               | G G               | El Alto | BLV066          | C C               | A A               | C C               | G A               |
| La Paz | BLV017          | T C               | G A               | C C               | G A               | El Alto | BLV067          | T T               | G A               | C C               | G G               |
| La Paz | BLV018          | T T               | G G               | C C               | G G               | El Alto | BLV068          | T T               | G G               | C C               | G A               |
| La Paz | BLV019          | T T               | G G               | C C               | G G               | El Alto | BLV069          | T T               | G G               | C G               | G A               |
| La Paz | BLV020          | C C               | A A               | C G               | G A               | El Alto | BLV070          | T T               | G G               | C C               | G G               |
| La Paz | BLV021          | T T               | G A               | C C               | G G               | El Alto | BLV071          | T T               | G G               | C C               | G G               |
| La Paz | BLV022          | T C               | A A               | C C               | G A               | El Alto | BLV072          | T T               | G G               | C C               | G G               |
| La Paz | BLV023          | T T               | G A               | C C               | G A               | El Alto | BLV073          | T T               | G G               | C C               | G G               |
| La Paz | BLV024          | T C               | G A               | C C               | G A               | El Alto | BLV074          | T T               | G G               | C C               | G G               |
| La Paz | BLV025          | T C               | G A               | C G               | G A               | El Alto | BLV075          | T T               | G A               | C C               | G G               |
| La Paz | BLV026          | C C               | A A               | C C               | A A               | El Alto | BLV077          | T T               | G G               | C C               | G G               |
| La Paz | BLV027          | T T               | G G               | C C               | G G               | El Alto | BLV078          | T T               | G A               | C C               | G G               |
| La Paz | BLV028          | C C               | A A               | C C               | A A               | El Alto | BLV079          | T C               | A A               | C C               | G G               |
| La Paz | BLV029          | T T               | G G               | C G               | G A               | El Alto | BLV080          | T C               | G A               | C C               | G A               |
| La Paz | BLV030          | T T               | G G               | C G               | G A               | El Alto | BLV081          | T T               | G A               | C C               | G G               |
| La Paz | BLV031          | T T               | G G               | C G               | G A               | El Alto | BLV082          | T T               | G G               | C G               | G A               |
| La Paz | BLV034          | T C               | G A               | C C               | G A               | El Alto | BLV083          | T C               | G A               | G G               | A A               |
| La Paz | BLV035          | T C               | G A               | C C               | A A               | El Alto | BLV084          | C C               | A A               | C C               | A A               |
| La Paz | BLV036          | T T               | G A               | C C               | G G               | El Alto | BLV085          | T C               | G A               | C G               | G A               |
| La Paz | BLV037          | T T               | G G               | C C               | G A               | El Alto | BLV086          | T C               | A A               | C C               | G A               |
| La Paz | BLV038          | T C               | G A               | C C               | G A               | El Alto | BLV087          | T T               | G G               | C C               | G G               |
| La Paz | BLV039          | T C               | G A               | C G               | G A               | El Alto | BLV089          | T C               | G A               | C C               | A A               |
| La Paz | BLV040          | T T               | G A               | C C               | G G               | El Alto | BLV090          | C C               | A A               | C C               | G A               |
| La Paz | BLV041          | T C               | G A               | C G               | G A               | El Alto | BLV091          | T T               | G G               | C C               | G G               |
| La Paz | BLV042          | T C               | A A               | C C               | G A               | El Alto | BLV092          | T C               | G A               | C C               | G A               |
| La Paz | BLV043          | C C               | A A               | C C               | G A               | El Alto | BLV093          | T C               | G A               | C C               | G A               |
| La Paz | BLV044          | T T               | G A               | C G               | A A               | El Alto | BLV094          | T T               | G G               | C G               | G A               |
| La Paz | BLV045          | T C               | G A               | C C               | G A               | El Alto | BLV095          | T T               | G G               | C G               | A A               |
| La Paz | BLV046          | T C               | G A               | C G               | G A               | El Alto | BLV096          | T C               | G A               | C C               | G A               |
| La Paz | BLV047          | T C               | G A               | C G               | G A               | El Alto | BLV097          | T T               | G G               | C G               | G A               |
| La Paz | BLV048          | T C               | G A               | C C               | G G               | El Alto | BLV098          | T T               | G G               | C C               | G G               |
| La Paz | BLV049          | T T               | G G               | C C               | G G               | El Alto | BLV099          | T C               | G A               | C C               | G A               |
| La Paz | BLV050          | T T               | G G               | C G               | G A               | El Alto | BLV100          | T T               | G G               | C C               | G G               |
|        |                 |                   |                   |                   |                   | El Alto | BLV101          | T C               | G A               | C G               | A A               |
|        |                 |                   |                   |                   |                   | El Alto | BLV102          | T C               | G A               | G G               | A A               |
|        |                 |                   |                   |                   |                   | El Alto | BLV103          | T T               | G G               | C C               | G G               |

Abbreviation: SNP, single nucleotide polymorphism

<sup>a</sup> Individual ID<sup>b</sup> SNP1, rs2486740; SNP2, rs508618; SNP3, rs12097901; and SNP4, rs1769792

**Table S2.** Allele frequencies of four SNPs (rs2486740, s508618, rs12097901, and rs1769792) around *EGLN1* in different human populations

| AFR        |                                   |                                 |                                  |                                 |                                  |                                 |                                 |                                  |
|------------|-----------------------------------|---------------------------------|----------------------------------|---------------------------------|----------------------------------|---------------------------------|---------------------------------|----------------------------------|
| RefSNP ID  | AFR_All                           | ACB <sup>a</sup>                | ASW <sup>a</sup>                 | ESN <sup>a</sup>                | GWD <sup>a</sup>                 | LWK <sup>a</sup>                | MSL <sup>a</sup>                | YRI <sup>a</sup>                 |
| rs2486740  | T: 0.738 (975)<br>C: 0.262 (347)  | T: 0.703 (135)<br>C: 0.297 (57) | T: 0.664 (81)<br>C: 0.336 (41)   | T: 0.717 (142)<br>C: 0.283 (56) | T: 0.743 (168)<br>C: 0.257 (58)  | T: 0.803 (159)<br>C: 0.197 (39) | T: 0.776 (132)<br>C: 0.224 (38) | T: 0.731 (158)<br>C: 0.269 (58)  |
| rs508618   | G: 0.190 (251)<br>A: 0.810 (1071) | G: 0.182 (35)<br>A: 0.818 (157) | G: 0.238 (29)<br>A: 0.762 (93)   | G: 0.187 (37)<br>A: 0.813 (161) | G: 0.133 (30)<br>A: 0.867 (196)  | G: 0.212 (42)<br>A: 0.788 (156) | G: 0.188 (32)<br>A: 0.812 (138) | G: 0.213 (46)<br>A: 0.787 (170)  |
| rs12097901 | C: 0.663 (877)<br>G: 0.337 (445)  | C: 0.646 (124)<br>G: 0.354 (68) | C: 0.713 (87)<br>G: 0.287 (35)   | C: 0.601 (119)<br>G: 0.399 (79) | C: 0.659 (149)<br>G: 0.341 (77)  | C: 0.712 (141)<br>G: 0.288 (57) | C: 0.665 (113)<br>G: 0.335 (57) | C: 0.667 (144)<br>G: 0.333 (72)  |
| rs1769792  | G: 0.514 (679)<br>A: 0.486 (643)  | G: 0.469 (90)<br>A: 0.531 (102) | G: 0.500 (61)<br>A: 0.500 (61)   | G: 0.530 (105)<br>A: 0.470 (93) | G: 0.540 (122)<br>A: 0.460 (104) | G: 0.495 (98)<br>A: 0.505 (100) | G: 0.582 (99)<br>A: 0.418 (71)  | G: 0.481 (104)<br>A: 0.519 (112) |
| AMR        |                                   |                                 |                                  |                                 |                                  |                                 |                                 |                                  |
| RefSNP ID  | AMR_All                           | BLV                             | CLM <sup>a</sup>                 | MXL <sup>a</sup>                | PEL <sup>a</sup>                 | PUR <sup>a</sup>                |                                 |                                  |
| rs2486740  | T: 0.539 (481)<br>C: 0.461 (411)  | T: 0.732 (145)<br>C: 0.268 (53) | T: 0.410 (77)<br>C: 0.590 (111)  | T: 0.500 (64)<br>C: 0.500 (64)  | T: 0.653 (111)<br>C: 0.347 (59)  | T: 0.404 (84)<br>C: 0.596 (124) |                                 |                                  |
| rs508618   | G: 0.371 (331)<br>A: 0.629 (561)  | G: 0.606 (120)<br>A: 0.394 (78) | G: 0.191 (36)<br>A: 0.809 (152)  | G: 0.273 (35)<br>A: 0.727 (93)  | G: 0.559 (95)<br>A: 0.441 (75)   | G: 0.216 (45)<br>A: 0.784 (163) |                                 |                                  |
| rs12097901 | C: 0.865 (772)<br>G: 0.135 (120)  | C: 0.828 (164)<br>G: 0.172 (34) | C: 0.862 (162)<br>G: 0.138 (26)  | C: 0.883 (113)<br>G: 0.117 (15) | C: 0.865 (147)<br>G: 0.135 (23)  | C: 0.894 (186)<br>G: 0.106 (22) |                                 |                                  |
| rs1769792  | A: 0.571 (509)<br>G: 0.429 (383)  | G: 0.606 (120)<br>A: 0.394 (78) | G: 0.309 (58)<br>A: 0.691 (130)  | G: 0.352 (45)<br>A: 0.648 (83)  | G: 0.535 (91)<br>A: 0.465 (79)   | G: 0.332 (69)<br>A: 0.668 (139) |                                 |                                  |
| EAS        |                                   |                                 |                                  |                                 |                                  |                                 |                                 |                                  |
| RefSNP ID  | EAS_All                           | CDX <sup>a</sup>                | CHB <sup>a</sup>                 | CHS <sup>a</sup>                | JPT <sup>a</sup>                 | KHV <sup>a</sup>                |                                 |                                  |
| rs2486740  | T: 0.467 (471)<br>C: 0.533 (537)  | T: 0.548 (102)<br>C: 0.452 (84) | T: 0.442 (91)<br>C: 0.558 (115)  | T: 0.448 (94)<br>C: 0.552 (116) | T: 0.462 (96)<br>C: 0.538 (112)  | T: 0.444 (88)<br>C: 0.556 (110) |                                 |                                  |
| rs508618   | G: 0.165 (166)<br>A: 0.835 (842)  | G: 0.220 (41)<br>A: 0.780 (145) | G: 0.112 (23)<br>A: 0.888 (183)  | G: 0.152 (32)<br>A: 0.848 (178) | G: 0.173 (36)<br>A: 0.827 (172)  | G: 0.172 (34)<br>A: 0.828 (164) |                                 |                                  |
| rs12097901 | C: 0.541 (545)<br>G: 0.459 (463)  | C: 0.575 (107)<br>G: 0.425 (79) | C: 0.515 (106)<br>G: 0.485 (100) | C: 0.543 (114)<br>G: 0.457 (96) | C: 0.529 (110)<br>G: 0.471 (98)  | C: 0.545 (108)<br>G: 0.455 (90) |                                 |                                  |
| rs1769792  | G: 0.033 (33)<br>A: 0.967 (975)   | G: 0.043 (8)<br>A: 0.957 (178)  | G: 0.029 (6)<br>A: 0.971 (200)   | G: 0.029 (6)<br>A: 0.971 (204)  | G: 0.058 (12)<br>A: 0.942 (196)  | G: 0.005 (1)<br>A: 0.995 (197)  |                                 |                                  |

**SAS**

| RefSNP ID  | SAS_All                          | BEB <sup>a</sup>                | GIH <sup>a</sup>                | ITU <sup>a</sup>                | PJL <sup>a</sup>                | STU <sup>a</sup>                |
|------------|----------------------------------|---------------------------------|---------------------------------|---------------------------------|---------------------------------|---------------------------------|
| rs2486740  | T: 0.427 (418)<br>C: 0.573 (560) | T: 0.424 (73)<br>C: 0.576 (99)  | T: 0.296 (61)<br>C: 0.704 (145) | T: 0.426 (87)<br>C: 0.574 (117) | T: 0.516 (99)<br>C: 0.484 (93)  | T: 0.480 (98)<br>C: 0.520 (106) |
| rs508618   | G: 0.213 (208)<br>A: 0.787 (770) | G: 0.203 (35)<br>A: 0.797 (137) | G: 0.146 (30)<br>A: 0.854 (176) | G: 0.245 (50)<br>A: 0.755 (154) | G: 0.224 (43)<br>A: 0.776 (149) | G: 0.245 (50)<br>A: 0.755 (154) |
| rs12097901 | C: 0.744 (728)<br>G: 0.256 (250) | C: 0.738 (127)<br>G: 0.262 (45) | C: 0.845 (174)<br>G: 0.155 (32) | C: 0.711 (145)<br>G: 0.289 (59) | C: 0.729 (140)<br>G: 0.271 (52) | C: 0.696 (142)<br>G: 0.304 (62) |
| rs1769792  | G: 0.102 (100)<br>A: 0.898 (878) | G: 0.099 (17)<br>A: 0.901 (155) | G: 0.117 (24)<br>A: 0.883 (182) | G: 0.069 (14)<br>A: 0.931 (190) | G: 0.161 (31)<br>A: 0.839 (161) | G: 0.069 (14)<br>A: 0.931 (190) |

**EUR**

| RefSNP ID  | EUR_All                          | CEU <sup>a</sup>                | FIN <sup>a</sup>                | GBR <sup>a</sup>                | IBS <sup>a</sup>                | TSI <sup>a</sup>                |
|------------|----------------------------------|---------------------------------|---------------------------------|---------------------------------|---------------------------------|---------------------------------|
| rs2486740  | T: 0.338 (340)<br>C: 0.662 (666) | T: 0.379 (75)<br>C: 0.621 (123) | T: 0.283 (56)<br>C: 0.717 (142) | T: 0.308 (56)<br>C: 0.692 (126) | T: 0.360 (77)<br>C: 0.640 (137) | T: 0.355 (76)<br>C: 0.645 (138) |
| rs508618   | G: 0.168 (169)<br>A: 0.832 (837) | G: 0.207 (41)<br>A: 0.793 (157) | G: 0.187 (37)<br>A: 0.813 (161) | G: 0.148 (27)<br>A: 0.852 (155) | G: 0.136 (29)<br>A: 0.864 (185) | G: 0.164 (35)<br>A: 0.836 (179) |
| rs12097901 | C: 0.940 (946)<br>G: 0.060 (60)  | C: 0.924 (183)<br>G: 0.076 (15) | C: 0.924 (183)<br>G: 0.076 (15) | C: 0.962 (175)<br>G: 0.038 (7)  | C: 0.949 (203)<br>G: 0.051 (11) | C: 0.944 (202)<br>G: 0.056 (12) |
| rs1769792  | G: 0.251 (253)<br>A: 0.749 (753) | G: 0.278 (55)<br>A: 0.722 (143) | G: 0.187 (37)<br>A: 0.813 (161) | G: 0.242 (44)<br>A: 0.758 (138) | G: 0.290 (62)<br>A: 0.710 (152) | G: 0.257 (55)<br>A: 0.743 (159) |

Values indicate allele frequencies, and the observed numbers are indicated in parentheses.

AFR, African. ACB: African Caribbeans in Barbados. ASW: Americans of African Ancestry in SW USA. ESN: Esan in Nigeria. GWD: Gambian in Western Divisions in the Gambia. LWK: Luhya in Webuye, Kenya. MSL: Mende in Sierra Leone. YRI: Yoruba in Ibadan, Nigeria. AMR, American. BLV: Bolivian from La Paz and El Alto, Bolivia. CLM: Colombians from Medellin, Colombia. MXL: Mexican Ancestry from Los Angeles USA. PEL: Peruvians from Lima, Peru. PUR: Puerto Ricans from Puerto Rico. EAS, East Asian. CDX: Chinese Dai in Xishuangbanna, China. CHB: Han Chinese in Beijing, China. CHS: Southern Han Chinese. JPT: Japanese in Tokyo, Japan. KHV: Kinh in Ho Chi Minh City, Vietnam. SAS, South Asian. BEB: Bengali from Bangladesh. GIH: Gujarati Indian from Houston, Texas. ITU: Indian Telugu from the UK. PJL: Punjabi from Lahore, Pakistan. STU: Sri Lankan Tamil from the UK. EUR, European. CEU: Utah Residents with Northern and Western European Ancestry. FIN: Finnish in Finland. GBR: British in England and Scotland. IBS: Iberian Population in Spain. TSI: Toscani in Italia

<sup>a</sup>Allele frequency obtained from the 1000 Genomes Project database

**Table S3.** Linkage disequilibrium ( $r^2$  below the diagonal and  $D'$  above the diagonal) of four SNPs around *EGLN1* in five ethnic groups from the 1000 Genomes Project

|            |       | rs2486740 | rs508618 | rs12097901 | rs1769792 |
|------------|-------|-----------|----------|------------|-----------|
| <b>AMR</b> |       | $D'$      |          |            |           |
| rs2486740  | $r^2$ |           | 1.000    | 0.015      | 0.816     |
| rs508618   |       | 0.465     |          | 0.044      | 0.405     |
| rs12097901 |       | 0.000     | 0.000    |            | 0.755     |
| rs1769792  |       | 0.433     | 0.117    | 0.049      |           |
| <b>EAS</b> |       | $D'$      |          |            |           |
| rs2486740  | $r^2$ |           | 1.000    | 0.619      | 0.772     |
| rs508618   |       | 0.225     |          | 0.376      | 0.637     |
| rs12097901 |       | 0.371     | 0.033    |            | 1.000     |
| rs1769792  |       | 0.023     | 0.070    | 0.029      |           |
| <b>SAS</b> |       | $D'$      |          |            |           |
| rs2486740  | $r^2$ |           | 0.958    | 0.609      | 0.808     |
| rs508618   |       | 0.332     |          | 0.191      | 0.416     |
| rs12097901 |       | 0.171     | 0.003    |            | 0.922     |
| rs1769792  |       | 0.100     | 0.073    | 0.033      |           |
| <b>EUR</b> |       | $D'$      |          |            |           |
| rs2486740  | $r^2$ |           | 1.000    | 0.396      | 0.755     |
| rs508618   |       | 0.396     |          | 0.802      | 0.383     |
| rs12097901 |       | 0.019     | 0.008    |            | 0.404     |
| rs1769792  |       | 0.375     | 0.088    | 0.003      |           |
| <b>AFR</b> |       | $D'$      |          |            |           |
| rs2486740  | $r^2$ |           | 0.985    | 0.803      | 0.495     |
| rs508618   |       | 0.081     |          | 0.508      | 0.387     |
| rs12097901 |       | 0.116     | 0.119    |            | 0.414     |
| rs1769792  |       | 0.092     | 0.037    | 0.092      |           |

Abbreviations: SNP, single nucleotide polymorphism. AMR, American. EAS, East Asian. SAS, South Asian. EUR, European. AFR, African

**Table S4.** Statistical tests for the association between *EGLN1* genotypes and hematological traits

| Phenotype                     | RefSNP ID  | Position                  | Cohort              | Welch's <i>t</i> -test<br>(Dominant <sup>e</sup> ) |                | Linear regression<br>(Additive <sup>e</sup> ) |                |
|-------------------------------|------------|---------------------------|---------------------|----------------------------------------------------|----------------|-----------------------------------------------|----------------|
|                               |            |                           |                     | <i>t</i> statistic                                 | <i>p</i> value | Estimate                                      | <i>p</i> value |
| Hb levels <sup>a</sup>        | rs2486740  | 1: 231517552 <sup>b</sup> | Entire <sup>d</sup> | 1.672                                              | 0.098          | -0.083                                        | 0.076          |
|                               |            | 1: 231381806 <sup>c</sup> | La Paz              | 1.855                                              | 0.071          | -0.166                                        | 0.019*         |
|                               |            |                           | El Alto             | 0.538                                              | 0.593          | -0.008                                        | 0.897          |
|                               | rs508618   | 1: 231532312 <sup>b</sup> | Entire <sup>d</sup> | 1.539                                              | 0.128          | -0.101                                        | 0.048*         |
|                               |            | 1: 231396566 <sup>c</sup> | La Paz              | 2.190                                              | 0.035*         | -0.188                                        | 0.009**        |
|                               |            |                           | El Alto             | 0.422                                              | 0.675          | -0.022                                        | 0.765          |
|                               | rs12097901 | 1: 231557255 <sup>b</sup> | Entire <sup>d</sup> | 0.799                                              | 0.428          | -0.037                                        | 0.344          |
|                               |            | 1: 231421509 <sup>c</sup> | La Paz              | 0.602                                              | 0.552          | -0.049                                        | 0.390          |
|                               |            |                           | El Alto             | 0.496                                              | 0.625          | -0.026                                        | 0.637          |
|                               | rs1769792  | 1: 231598618 <sup>b</sup> | Entire <sup>d</sup> | 2.487                                              | 0.015*         | -0.077                                        | 0.104          |
|                               |            | 1: 231462872 <sup>c</sup> | La Paz              | 2.854                                              | 0.008**        | -0.133                                        | 0.041*         |
|                               |            |                           | El Alto             | 1.051                                              | 0.299          | -0.025                                        | 0.718          |
| SpO <sub>2</sub> <sup>a</sup> | rs2486740  | 1: 231517552 <sup>b</sup> | Entire <sup>d</sup> | 0.779                                              | 0.438          | -0.007                                        | 0.779          |
|                               |            | 1: 231381806 <sup>c</sup> | La Paz              | -0.397                                             | 0.693          | 0.029                                         | 0.488          |
|                               |            |                           | El Alto             | 1.754                                              | 0.086          | -0.051                                        | 0.139          |
|                               | rs508618   | 1: 231532312 <sup>b</sup> | Entire <sup>d</sup> | -0.015                                             | 0.988          | -0.013                                        | 0.648          |
|                               |            | 1: 231396566 <sup>c</sup> | La Paz              | -0.726                                             | 0.477          | 0.028                                         | 0.517          |
|                               |            |                           | El Alto             | 1.375                                              | 0.176          | -0.076                                        | 0.055          |
|                               | rs12097901 | 1: 231557255 <sup>b</sup> | Entire <sup>d</sup> | -0.211                                             | 0.834          | 0.006                                         | 0.761          |
|                               |            | 1: 231421509 <sup>c</sup> | La Paz              | -1.470                                             | 0.150          | 0.055                                         | 0.091          |
|                               |            |                           | El Alto             | 1.470                                              | 0.155          | -0.041                                        | 0.184          |
|                               | rs1769792  | 1: 231598618 <sup>b</sup> | Entire <sup>d</sup> | -0.535                                             | 0.595          | 0.017                                         | 0.514          |
|                               |            | 1: 231462872 <sup>c</sup> | La Paz              | -1.571                                             | 0.136          | 0.089                                         | 0.016*         |
|                               |            |                           | El Alto             | 1.510                                              | 0.138          | -0.058                                        | 0.121          |
| Heart rate                    | rs2486740  | 1: 231517552 <sup>b</sup> | Entire <sup>d</sup> | 1.665                                              | 0.099          | -0.008                                        | 0.142          |
|                               |            | 1: 231381806 <sup>c</sup> | La Paz              | 1.597                                              | 0.119          | -0.009                                        | 0.231          |
|                               |            |                           | El Alto             | 0.798                                              | 0.429          | -0.009                                        | 0.293          |
|                               | rs508618   | 1: 231532312 <sup>b</sup> | Entire <sup>d</sup> | 0.653                                              | 0.516          | 5.1×10 <sup>-5</sup>                          | 0.993          |
|                               |            | 1: 231396566 <sup>c</sup> | La Paz              | 1.007                                              | 0.328          | -3.5×10 <sup>-3</sup>                         | 0.650          |
|                               |            |                           | El Alto             | 0.169                                              | 0.866          | 1.5×10 <sup>-3</sup>                          | 0.883          |
|                               | rs12097901 | 1: 231557255 <sup>b</sup> | Entire <sup>d</sup> | -0.756                                             | 0.453          | 3.3×10 <sup>-3</sup>                          | 0.476          |
|                               |            | 1: 231421509 <sup>c</sup> | La Paz              | 1.023                                              | 0.313          | -0.007                                        | 0.251          |
|                               |            |                           | El Alto             | -2.353                                             | 0.028*         | 0.018                                         | 0.015*         |
|                               | rs1769792  | 1: 231598618 <sup>b</sup> | Entire <sup>d</sup> | 0.780                                              | 0.439          | -3.1×10 <sup>-3</sup>                         | 0.569          |
|                               |            | 1: 231462872 <sup>c</sup> | La Paz              | 0.823                                              | 0.422          | -0.008                                        | 0.239          |
|                               |            |                           | El Alto             | 0.553                                              | 0.584          | 1.8×10 <sup>-3</sup>                          | 0.845          |
| SBP                           | rs2486740  | 1: 231517552 <sup>b</sup> | Entire <sup>d</sup> | 0.249                                              | 0.804          | -1.2×10 <sup>-3</sup>                         | 0.825          |
|                               |            | 1: 231381806 <sup>c</sup> | La Paz              | 0.242                                              | 0.810          | -4.7×10 <sup>-3</sup>                         | 0.589          |
|                               |            |                           | El Alto             | -0.089                                             | 0.930          | 4.3×10 <sup>-3</sup>                          | 0.564          |
|                               | rs508618   | 1: 231532312 <sup>b</sup> | Entire <sup>d</sup> | -1.199                                             | 0.234          | 0.006                                         | 0.338          |
|                               |            | 1: 231396566 <sup>c</sup> | La Paz              | -1.742                                             | 0.093          | 0.005                                         | 0.544          |
|                               |            |                           | El Alto             | -0.923                                             | 0.360          | 0.013                                         | 0.138          |
|                               | rs12097901 | 1: 231557255 <sup>b</sup> | Entire <sup>d</sup> | 1.203                                              | 0.233          | -4.6×10 <sup>-3</sup>                         | 0.300          |
|                               |            | 1: 231421509 <sup>c</sup> | La Paz              | 1.006                                              | 0.320          | -0.007                                        | 0.315          |
|                               |            |                           | El Alto             | 0.375                                              | 0.711          | -1.9×10 <sup>-3</sup>                         | 0.772          |
|                               | rs1769792  | 1: 231598618 <sup>b</sup> | Entire <sup>d</sup> | 1.742                                              | 0.087          | -0.007                                        | 0.174          |
|                               |            | 1: 231462872 <sup>c</sup> | La Paz              | 1.447                                              | 0.169          | -0.011                                        | 0.141          |
|                               |            |                           | El Alto             | 0.441                                              | 0.662          | 1.4×10 <sup>-3</sup>                          | 0.868          |

|     |            |                           |                     |        |       |                       |       |
|-----|------------|---------------------------|---------------------|--------|-------|-----------------------|-------|
| DBP | rs2486740  | 1: 231517552 <sup>b</sup> | Entire <sup>d</sup> | 0.425  | 0.672 | $2.0 \times 10^{-3}$  | 0.787 |
|     |            | 1: 231381806 <sup>c</sup> | La Paz              | 0.374  | 0.710 | $-4.1 \times 10^{-5}$ | 0.998 |
|     |            |                           | El Alto             | -0.066 | 0.948 | $2.4 \times 10^{-3}$  | 0.831 |
|     | rs508618   | 1: 231532312 <sup>b</sup> | Entire <sup>d</sup> | 0.724  | 0.472 | $-4.7 \times 10^{-3}$ | 0.573 |
|     |            | 1: 231396566 <sup>c</sup> | La Paz              | -0.651 | 0.521 | 0.009                 | 0.561 |
|     |            |                           | El Alto             | 0.227  | 0.822 | $-9.5 \times 10^{-4}$ | 0.942 |
|     | rs12097901 | 1: 231557255 <sup>b</sup> | Entire <sup>d</sup> | 0.007  | 0.994 | $1.4 \times 10^{-3}$  | 0.827 |
|     |            | 1: 231421509 <sup>c</sup> | La Paz              | 0.011  | 0.992 | $-1.5 \times 10^{-3}$ | 0.898 |
|     |            |                           | El Alto             | -0.725 | 0.476 | 0.009                 | 0.357 |
|     | rs1769792  | 1: 231598618 <sup>b</sup> | Entire <sup>d</sup> | 0.635  | 0.527 | $1.9 \times 10^{-3}$  | 0.803 |
|     |            | 1: 231462872 <sup>c</sup> | La Paz              | 0.250  | 0.806 | $3.5 \times 10^{-3}$  | 0.798 |
|     |            |                           | El Alto             | -0.353 | 0.726 | 0.012                 | 0.312 |

Abbreviations: Hb, hemoglobin. SpO<sub>2</sub>, percutaneous arterial oxygen saturation. SBP, systolic blood pressure. DBP, diastolic blood pressure

<sup>a</sup> Estimated value obtained by using a noninvasive method

<sup>b</sup> Chromosomal position in NCBI build GRCh37

<sup>c</sup> Chromosomal position in NCBI build GRCh38

<sup>d</sup> Combined cohort of La Paz and El Alto cohorts

<sup>e</sup> Genetic inheritance model

\*  $p < 0.05$

\*\*  $p < 0.01$

**Table S5.** Hematological characteristics of 99 Bolivian highlanders with different genotypes of four SNPs around *EGLN1*

| RefSNP ID  | Position                                               | Genotype            | Cohort              | N <sup>d</sup> | Hb (g/dL) <sup>e, f, g</sup> | SpO <sub>2</sub> (%) <sup>e, f</sup> | HR (bpm) <sup>e</sup> | SBP (mmHg) <sup>e</sup> | DBP (mmHg) <sup>e</sup> |
|------------|--------------------------------------------------------|---------------------|---------------------|----------------|------------------------------|--------------------------------------|-----------------------|-------------------------|-------------------------|
| rs2486740  | 1: 231517552 <sup>a</sup><br>1: 231381806 <sup>b</sup> | TT                  | Entire <sup>c</sup> | 54             | 14.6 ± 1.4                   | 90.6 ± 2.6                           | 78.8 ± 13.6           | 113.9 ± 12.8            | 66.2 ± 9.0              |
|            |                                                        |                     | La Paz              | 25             | 14.7 ± 1.2                   | 91.2 ± 2.7                           | 82.0 ± 16.3           | 110.2 ± 12.7            | 61.2 ± 6.9              |
|            |                                                        |                     | El Alto             | 29             | 15.0 ± 1.1                   | 89.3 ± 3.2                           | 69.0 ± 11.1           | 126.0 ± 11.0            | 72.3 ± 8.3              |
|            | TC                                                     | Entire <sup>c</sup> | 37                  | 14.2 ± 1.4     | 90.1 ± 2.5                   | 75.0 ± 9.1                           | 113.3 ± 11.2          | 65.3 ± 8.4              |                         |
|            |                                                        | La Paz              | 18                  | 14.2 ± 1.6     | 91.2 ± 2.1                   | 75.6 ± 8.2                           | 110.3 ± 10.9          | 59.9 ± 6.2              |                         |
|            |                                                        | El Alto             | 19                  | 14.2 ± 1.3     | 88.9 ± 2.3                   | 74.5 ± 10.1                          | 116.2 ± 11.0          | 70.3 ± 7.0              |                         |
|            | CC                                                     | Entire <sup>c</sup> | 8                   | 13.8 ± 1.3     | 91.1 ± 2.7                   | 74.9 ± 9.3                           | 113.4 ± 13.8          | 66.3 ± 8.7              |                         |
|            |                                                        | La Paz              | 5                   | 13.1 ± 0.8     | 92.2 ± 1.9                   | 78.4 ± 7.0                           | 105.8 ± 9.1           | 62.6 ± 7.3              |                         |
|            |                                                        | El Alto             | 3                   | 14.5 ± 1.6     | 90.2 ± 2.5                   | 76.0 ± 10.3                          | 117.2 ± 12.3          | 70.4 ± 8.4              |                         |
| rs508618   | 1: 231532312 <sup>a</sup><br>1: 231396566 <sup>b</sup> | GG                  | Entire <sup>c</sup> | 37             | 14.7 ± 1.4                   | 90.5 ± 2.6                           | 78.1 ± 13.1           | 111.8 ± 11.5            | 66.7 ± 9.0              |
|            |                                                        |                     | La Paz              | 14             | 14.9 ± 1.0                   | 90.9 ± 2.8                           | 82.8 ± 17.1           | 105.4 ± 10.9            | 59.9 ± 6.6              |
|            |                                                        |                     | El Alto             | 23             | 14.4 ± 1.3                   | 88.0 ± 2.7                           | 77.0 ± 14.0           | 124.4 ± 14.3            | 71.0 ± 6.6              |
|            | GA                                                     | Entire <sup>c</sup> | 46                  | 14.3 ± 1.4     | 90.7 ± 2.4                   | 75.4 ± 11.0                          | 114.9 ± 12.3          | 65.3 ± 8.7              |                         |
|            |                                                        | La Paz              | 25                  | 14.4 ± 1.5     | 91.5 ± 2.3                   | 76.4 ± 11.7                          | 113.3 ± 12.3          | 61.2 ± 6.8              |                         |
|            |                                                        | El Alto             | 21                  | 14.3 ± 1.2     | 89.7 ± 2.2                   | 74.1 ± 10.3                          | 116.8 ± 12.2          | 70.0 ± 8.4              |                         |
|            | AA                                                     | Entire <sup>c</sup> | 16                  | 13.8 ± 1.3     | 89.9 ± 2.9                   | 79.6 ± 11.1                          | 114.5 ± 14.0          | 65.6 ± 8.1              |                         |
|            |                                                        | La Paz              | 9                   | 13.4 ± 1.1     | 91.4 ± 2.2                   | 81.6 ± 8.6                           | 106.8 ± 7.6           | 61.4 ± 6.7              |                         |
|            |                                                        | El Alto             | 7                   | 14.5 ± 1.7     | 90.2 ± 2.6                   | 75.3 ± 9.3                           | 115.7 ± 10.2          | 70.8 ± 7.7              |                         |
| rs12097901 | 1: 231557255 <sup>a</sup><br>1: 231421509 <sup>b</sup> | CC                  | Entire <sup>c</sup> | 68             | 14.5 ± 1.4                   | 90.4 ± 2.5                           | 76.5 ± 12.1           | 114.6 ± 12.8            | 65.9 ± 8.5              |
|            |                                                        |                     | La Paz              | 31             | 14.4 ± 1.4                   | 90.9 ± 2.5                           | 80.6 ± 13.6           | 110.9 ± 12.8            | 60.9 ± 6.9              |
|            |                                                        |                     | El Alto             | 37             | 14.5 ± 1.4                   | 90.0 ± 2.5                           | 73.0 ± 9.6            | 117.7 ± 12.1            | 70.0 ± 7.5              |
|            | CG                                                     | Entire <sup>c</sup> | 28                  | 14.2 ± 1.6     | 90.5 ± 2.7                   | 78.4 ± 11.7                          | 111.5 ± 11.1          | 65.5 ± 9.1              |                         |
|            |                                                        | La Paz              | 16                  | 14.3 ± 1.4     | 91.8 ± 2.0                   | 77.3 ± 12.4                          | 108.1 ± 9.2           | 61.1 ± 6.4              |                         |
|            |                                                        | El Alto             | 12                  | 14.2 ± 1.8     | 88.8 ± 2.7                   | 79.8 ± 11.0                          | 116.2 ± 12.0          | 71.3 ± 9.0              |                         |
|            | GG                                                     | Entire <sup>c</sup> | 3                   | 13.8 ± 0.9     | 91.0 ± 3.5                   | 78.7 ± 10.2                          | 112.3 ± 10.0          | 69.3 ± 9.8              |                         |
|            |                                                        | La Paz              | 1                   | 12.8 ± NA      | 95.0 ± NA                    | 67.0 ± NA                            | 102.0 ± NA            | 58.0 ± NA               |                         |
|            |                                                        | El Alto             | 2                   | 14.3 ± 0.4     | 89.0 ± 0.0                   | 84.5 ± 2.1                           | 117.5 ± 6.4           | 75.0 ± 0.0              |                         |
| rs1769792  | 1: 231598618 <sup>a</sup><br>1: 231462872 <sup>b</sup> | GG                  | Entire <sup>c</sup> | 33             | 14.8 ± 1.2                   | 90.3 ± 2.5                           | 78.5 ± 13.4           | 116.8 ± 13.6            | 66.6 ± 8.1              |
|            |                                                        |                     | La Paz              | 13             | 15.1 ± 1.0                   | 90.2 ± 3.1                           | 82.2 ± 16.4           | 114.7 ± 15.9            | 61.3 ± 7.1              |
|            | GA                                                     | Entire <sup>c</sup> | 20                  | 14.8 ± 0.8     | 88.7 ± 1.0                   | 80.0 ± 10.4                          | 118.8 ± 11.7          | 75.2 ± 8.5              |                         |
|            |                                                        | Entire <sup>c</sup> | 54                  | 14.1 ± 1.5     | 90.5 ± 2.7                   | 76.2 ± 11.3                          | 111.7 ± 10.9          | 64.7 ± 8.5              |                         |

|    |                     |    |            |            |             |              |             |
|----|---------------------|----|------------|------------|-------------|--------------|-------------|
|    | La Paz              | 29 | 14.1 ± 1.5 | 91.4 ± 1.9 | 78.9 ± 12.1 | 107.9 ± 8.5  | 60.3 ± 6.0  |
|    | El Alto             | 25 | 14.1 ± 1.6 | 89.4 ± 3.0 | 73.0 ± 9.5  | 116.2 ± 11.8 | 69.8 ± 8.1  |
| AA | Entire <sup>c</sup> | 12 | 14.4 ± 1.0 | 90.8 ± 2.7 | 77.3 ± 10.3 | 113.6 ± 13.0 | 69.1 ± 10.4 |
|    | La Paz              | 6  | 14.0 ± 1.2 | 93.0 ± 1.8 | 74.7 ± 10.5 | 108.3 ± 13.0 | 63.0 ± 8.8  |
|    | El Alto             | 6  | 14.7 ± 1.3 | 90.3 ± 2.0 | 76.1 ± 10.8 | 118.3 ± 12.1 | 70.1 ± 6.8  |

Abbreviations: SNP, single nucleotide polymorphism. Hb, hemoglobin level. SpO<sub>2</sub>, percutaneous arterial oxygen saturation. HR, heart rate. SBP, systolic blood pressure. DBP, diastolic blood pressure. NA, not applicable

<sup>a</sup> Chromosomal position in NCBI build GRCh37

<sup>b</sup> Chromosomal position in NCBI build GRCh38

<sup>c</sup> Combined cohort of La Paz and El Alto cohorts

<sup>d</sup> The number of subjects

<sup>e</sup> Quantitative data are presented as the mean ± standard deviation of the mean

<sup>f</sup> Estimated value obtained by using a noninvasive method

<sup>g</sup> One individual was removed due to a lack of Hb measurement



**Table S6.** Observed number of haplotypes for four SNPs (rs2486740-s508618-rs12097901-rs1769792) around *EGLNI* in different human populations

| Ethnic group | Population       | Haplotype |      |      |      |      |      |      |      |      |      |      |      |      | Total |
|--------------|------------------|-----------|------|------|------|------|------|------|------|------|------|------|------|------|-------|
|              |                  | CACA      | TACG | TAGA | TGCG | TGGA | TGCA | CAGA | CACG | TACA | TAGG | TGGG | CGCA | CAGG |       |
| AMR          | BLV              | 29        | 19   | 2    | 84   | 18   | 15   | 10   | 13   | 3    | 2    | 2    | 1    | 0    | 198   |
|              | CLM <sup>a</sup> | 95        | 34   | 5    | 14   | 7    | 12   | 10   | 6    | 1    | 1    | 3    | 0    | 0    | 188   |
|              | MXL <sup>a</sup> | 51        | 24   | 2    | 16   | 1    | 18   | 10   | 3    | 1    | 2    | 0    | 0    | 0    | 128   |
|              | PEL <sup>a</sup> | 43        | 14   | 1    | 74   | 8    | 13   | 13   | 2    | 1    | 0    | 0    | 0    | 1    | 170   |
|              | PUR <sup>a</sup> | 100       | 30   | 5    | 25   | 5    | 14   | 11   | 13   | 4    | 0    | 1    | 0    | 0    | 208   |
| EAS          | CDX <sup>a</sup> | 71        | 0    | 46   | 8    | 20   | 13   | 13   | 0    | 15   | 0    | 0    | 0    | 0    | 186   |
|              | CHB <sup>a</sup> | 88        | 3    | 57   | 2    | 17   | 4    | 26   | 1    | 8    | 0    | 0    | 0    | 0    | 206   |
|              | CHS <sup>a</sup> | 98        | 0    | 56   | 6    | 22   | 4    | 18   | 0    | 6    | 0    | 0    | 0    | 0    | 210   |
|              | JPT <sup>a</sup> | 85        | 3    | 48   | 6    | 26   | 4    | 24   | 3    | 9    | 0    | 0    | 0    | 0    | 208   |
|              | KHV <sup>a</sup> | 97        | 0    | 52   | 1    | 25   | 8    | 13   | 0    | 2    | 0    | 0    | 0    | 0    | 198   |
| SAS          | BEB <sup>a</sup> | 89        | 4    | 32   | 10   | 6    | 19   | 7    | 3    | 2    | 0    | 0    | 0    | 0    | 172   |
|              | GIH <sup>a</sup> | 126       | 7    | 13   | 9    | 6    | 13   | 11   | 6    | 11   | 2    | 0    | 2    | 0    | 206   |
|              | ITU <sup>a</sup> | 99        | 3    | 32   | 10   | 13   | 24   | 14   | 1    | 5    | 0    | 0    | 3    | 0    | 204   |
|              | PJL <sup>a</sup> | 84        | 15   | 36   | 15   | 8    | 20   | 8    | 1    | 5    | 0    | 0    | 0    | 0    | 192   |
|              | STU <sup>a</sup> | 90        | 4    | 36   | 10   | 10   | 30   | 16   | 0    | 8    | 0    | 0    | 0    | 0    | 204   |
| EUR          | CEU <sup>a</sup> | 105       | 21   | 7    | 20   | 0    | 21   | 6    | 12   | 4    | 2    | 0    | 0    | 0    | 198   |
|              | FIN <sup>a</sup> | 131       | 9    | 5    | 21   | 0    | 16   | 7    | 4    | 2    | 3    | 0    | 0    | 0    | 198   |
|              | GBR <sup>a</sup> | 116       | 19   | 4    | 18   | 0    | 9    | 3    | 7    | 6    | 0    | 0    | 0    | 0    | 182   |
|              | IBS <sup>a</sup> | 120       | 35   | 3    | 14   | 1    | 14   | 5    | 11   | 9    | 1    | 0    | 0    | 1    | 214   |
|              | TSI <sup>a</sup> | 130       | 29   | 7    | 18   | 1    | 16   | 2    | 6    | 3    | 2    | 0    | 0    | 0    | 214   |
| AFR          | ACB <sup>a</sup> | 42        | 51   | 24   | 7    | 19   | 2    | 4    | 11   | 11   | 14   | 7    | 0    | 0    | 192   |
|              | ASW <sup>a</sup> | 26        | 28   | 16   | 17   | 9    | 1    | 4    | 10   | 4    | 5    | 1    | 1    | 0    | 122   |
|              | ESN <sup>a</sup> | 33        | 54   | 26   | 4    | 25   | 2    | 2    | 21   | 5    | 20   | 6    | 0    | 0    | 198   |
|              | GWD <sup>a</sup> | 37        | 84   | 30   | 4    | 24   | 2    | 3    | 14   | 8    | 16   | 0    | 0    | 4    | 226   |
|              | LWK <sup>a</sup> | 32        | 68   | 16   | 8    | 24   | 10   | 1    | 6    | 17   | 16   | 0    | 0    | 0    | 198   |
|              | MSL <sup>a</sup> | 29        | 59   | 11   | 6    | 17   | 5    | 2    | 7    | 7    | 23   | 4    | 0    | 0    | 170   |
|              | YRI <sup>a</sup> | 39        | 61   | 25   | 9    | 27   | 4    | 2    | 16   | 15   | 11   | 6    | 0    | 1    | 216   |
|              | Total            | 2085      | 678  | 597  | 436  | 339  | 313  | 245  | 177  | 172  | 120  | 30   | 7    | 7    | 5206  |

AMR, American. BLV: Bolivian from La Paz and El Alto, Bolivia. CLM: Colombians from Medellin, Colombia. MXL: Mexican Ancestry from Los Angeles USA. PEL: Peruvians from Lima, Peru. PUR: Puerto Ricans from Puerto Rico. EAS, East Asian. CDX: Chinese Dai in Xishuangbanna, China. CHB: Han Chinese in Beijing, China. CHS: Southern Han Chinese. JPT: Japanese in Tokyo, Japan. KHV: Kinh in Ho Chi Minh City, Vietnam. SAS, South Asian. BEB: Bengali from Bangladesh. GIH: Gujarati Indian from Houston, Texas. ITU: Indian Telugu from the UK. PJL: Punjabi from Lahore, Pakistan. STU: Sri Lankan Tamil from

the UK. EUR, European. CEU: Utah Residents with Northern and Western European Ancestry. FIN: Finnish in Finland. GBR: British in England and Scotland. IBS: Iberian Population in Spain. TSI: Toscani in Italia. AFR, African. ACB: African Caribbeans in Barbados. ASW: Americans of African Ancestry in SW USA. ESN: Esan in Nigeria. GWD: Gambian in Western Divisions in the Gambia. LWK: Luhya in Webuye, Kenya. MSL: Mende in Sierra Leone. YRI: Yoruba in Ibadan, Nigeria

<sup>a</sup>Observed number of haplotypes estimated using the variant call format (VCF) data in the 1000 Genomes Project database

**Table S7.** Three statistical values (weighted  $F_{ST}$ , PBS, and PBS') in a ~436.3 kb genomic region containing *EGLNI* (a sliding window with 5 kb windows and 5 kb steps), calculated using the estimated allele frequency data of three populations (HNA, CLM, and CEU)

| Position <sup>a</sup> | $F_{ST}$<br>CEU-CLM | $F_{ST}$<br>CEU-HNA | $F_{ST}$<br>CLM-HNA | PBS <sub>CEU</sub> | PBS <sub>CLM</sub> | PBS <sub>HNA</sub> | PBS' <sub>CEU</sub> | PBS' <sub>CLM</sub> | PBS' <sub>HNA</sub> |
|-----------------------|---------------------|---------------------|---------------------|--------------------|--------------------|--------------------|---------------------|---------------------|---------------------|
| 1:231367500           | 0.0028              | 0.1342              | 0.1513              | -0.0086            | 0.0114             | 0.1527             | -0.0074             | 0.0098              | 0.1321              |
| 1:231372500           | 0.0111              | 0.0463              | 0.0199              | 0.0192             | -0.0081            | 0.0282             | 0.0185              | -0.0077             | 0.0271              |
| 1:231377500           | -0.0077             | 0.0940              | 0.0793              | 0.0042             | -0.0119            | 0.0945             | 0.0038              | -0.0109             | 0.0870              |
| 1:231382500           | 0.0096              | 0.0487              | 0.0427              | 0.0080             | 0.0016             | 0.0420             | 0.0076              | 0.0015              | 0.0399              |
| 1:231387500           | 0.0125              | 0.0393              | 0.0573              | -0.0031            | 0.0157             | 0.0433             | -0.0030             | 0.0149              | 0.0410              |
| 1:231392500           | 0.0102              | 0.1188              | 0.1350              | -0.0042            | 0.0144             | 0.1306             | -0.0036             | 0.0127              | 0.1145              |
| 1:231397500           | 0.0170              | 0.0387              | 0.0683              | -0.0070            | 0.0242             | 0.0465             | -0.0066             | 0.0227              | 0.0437              |
| 1:231402500           | -0.0032             | 0.0720              | 0.0960              | -0.0147            | 0.0115             | 0.0894             | -0.0135             | 0.0106              | 0.0823              |
| 1:231407500           | 0.0093              | 0.0283              | 0.0408              | -0.0018            | 0.0111             | 0.0305             | -0.0017             | 0.0107              | 0.0293              |
| 1:231412500           | 0.0077              | 0.0600              | 0.0631              | 0.0022             | 0.0055             | 0.0597             | 0.0020              | 0.0052              | 0.0559              |
| 1:231417500           | 0.0178              | 0.0505              | 0.0892              | -0.0119            | 0.0298             | 0.0637             | -0.0110             | 0.0275              | 0.0589              |
| 1:231422500           | 0.0072              | 0.0476              | 0.0459              | 0.0045             | 0.0027             | 0.0443             | 0.0043              | 0.0026              | 0.0421              |
| 1:231427500           | 0.0083              | 0.1180              | 0.0935              | 0.0179             | -0.0095            | 0.1077             | 0.0160              | -0.0085             | 0.0965              |
| 1:231432500           | 0.0213              | 0.0406              | 0.0177              | 0.0226             | -0.0010            | 0.0189             | 0.0217              | -0.0010             | 0.0181              |
| 1:231437500           | 0.0423              | 0.0372              | 0.0965              | -0.0102            | 0.0534             | 0.0481             | -0.0093             | 0.0489              | 0.0441              |
| 1:231442500           | 0.0346              | 0.1384              | 0.0744              | 0.0535             | -0.0183            | 0.0955             | 0.0473              | -0.0161             | 0.0845              |
| 1:231447500           | 0.0531              | 0.0193              | 0.0141              | 0.0299             | 0.0246             | -0.0104            | 0.0287              | 0.0236              | -0.0100             |
| 1:231452500           | 0.0164              | 0.0230              | 0.0220              | 0.0088             | 0.0078             | 0.0145             | 0.0085              | 0.0075              | 0.0140              |
| 1:231457500           | -0.0003             | 0.1015              | 0.0871              | 0.0078             | -0.0081            | 0.0992             | 0.0071              | -0.0073             | 0.0903              |
| 1:231462500           | 0.0017              | 0.1309              | 0.1734              | -0.0242            | 0.0259             | 0.1646             | -0.0208             | 0.0222              | 0.1411              |
| 1:231467500           | 0.0001              | 0.1226              | 0.1410              | -0.0106            | 0.0107             | 0.1413             | -0.0093             | 0.0093              | 0.1238              |
| 1:231472500           | -0.0006             | 0.1062              | 0.1205              | -0.0083            | 0.0078             | 0.1206             | -0.0075             | 0.0070              | 0.1077              |
| 1:231477500           | 0.0031              | 0.1118              | 0.1735              | -0.0345            | 0.0375             | 0.1530             | -0.0298             | 0.0325              | 0.1323              |
| 1:231482500           | 0.0037              | 0.0954              | 0.1325              | -0.0191            | 0.0228             | 0.1194             | -0.0170             | 0.0203              | 0.1063              |
| 1:231487500           | 0.0096              | 0.1232              | 0.1754              | -0.0259            | 0.0355             | 0.1574             | -0.0222             | 0.0304              | 0.1348              |
| 1:231492500           | 0.0032              | 0.1306              | 0.1767              | -0.0256            | 0.0288             | 0.1656             | -0.0219             | 0.0247              | 0.1417              |
| 1:231497500           | -0.0041             | 0.1302              | 0.1626              | -0.0210            | 0.0169             | 0.1606             | -0.0182             | 0.0146              | 0.1388              |
| 1:231502500           | -0.0011             | 0.1835              | 0.1987              | -0.0099            | 0.0089             | 0.2126             | -0.0082             | 0.0073              | 0.1755              |
| 1:231507500           | 0.0053              | 0.1542              | 0.1801              | -0.0129            | 0.0182             | 0.1804             | -0.0109             | 0.0154              | 0.1521              |
| 1:231512500           | 0.0011              | 0.1474              | 0.1934              | -0.0272            | 0.0283             | 0.1867             | -0.0229             | 0.0238              | 0.1572              |
| 1:231517500           | -0.0022             | 0.1523              | 0.1922              | -0.0252            | 0.0230             | 0.1904             | -0.0212             | 0.0194              | 0.1603              |
| 1:231522500           | -0.0017             | 0.1315              | 0.1644              | -0.0202            | 0.0184             | 0.1612             | -0.0174             | 0.0159              | 0.1390              |
| 1:231527500           | 0.0060              | 0.1365              | 0.1566              | -0.0088            | 0.0148             | 0.1555             | -0.0076             | 0.0128              | 0.1339              |
| 1:231532500           | 0.0007              | 0.1450              | 0.1855              | -0.0239            | 0.0247             | 0.1806             | -0.0203             | 0.0209              | 0.1528              |
| 1:231537500           | 0.0044              | 0.1435              | 0.2010              | -0.0325            | 0.0369             | 0.1874             | -0.0273             | 0.0310              | 0.1573              |
| 1:231542500           | 0.0622              | 0.1243              | 0.1841              | -0.0033            | 0.0675             | 0.1360             | -0.0027             | 0.0562              | 0.1133              |
| 1:231547500           | 0.0647              | 0.1953              | 0.2276              | 0.0130             | 0.0540             | 0.2043             | 0.0102              | 0.0424              | 0.1607              |
| 1:231552500           | 0.0748              | 0.0964              | 0.1511              | 0.0076             | 0.0701             | 0.0938             | 0.0065              | 0.0598              | 0.0800              |
| 1:231557500           | 0.0581              | 0.1575              | 0.0737              | 0.0773             | -0.0175            | 0.0941             | 0.0670              | -0.0151             | 0.0815              |
| 1:231562500           | 0.1020              | 0.3151              | 0.1632              | 0.1539             | -0.0464            | 0.2245             | 0.1155              | -0.0348             | 0.1685              |
| 1:231567500           | 0.0375              | 0.2291              | 0.0804              | 0.1073             | -0.0691            | 0.1529             | 0.0901              | -0.0580             | 0.1283              |
| 1:231572500           | 0.0572              | 0.1908              | 0.0700              | 0.0990             | -0.0402            | 0.1127             | 0.0845              | -0.0343             | 0.0962              |
| 1:231577500           | 0.1294              | 0.3791              | 0.1346              | 0.2353             | -0.0967            | 0.2413             | 0.1705              | -0.0701             | 0.1749              |
| 1:231582500           | 0.1007              | 0.3650              | 0.1340              | 0.2082             | -0.1021            | 0.2460             | 0.1540              | -0.0755             | 0.1819              |
| 1:231587500           | 0.0908              | 0.3708              | 0.2197              | 0.1552             | -0.0600            | 0.3080             | 0.1106              | -0.0427             | 0.2195              |
| 1:231592500           | 0.0875              | 0.3414              | 0.1754              | 0.1582             | -0.0666            | 0.2594             | 0.1171              | -0.0493             | 0.1920              |
| 1:231597500           | 0.0933              | 0.3445              | 0.1347              | 0.1878             | -0.0899            | 0.2346             | 0.1409              | -0.0675             | 0.1760              |
| 1:231602500           | 0.0488              | 0.1909              | 0.1107              | 0.0723             | -0.0222            | 0.1395             | 0.0607              | -0.0186             | 0.1173              |
| 1:231607500           | 0.0662              | 0.2009              | 0.0685              | 0.1109             | -0.0424            | 0.1134             | 0.0938              | -0.0359             | 0.0959              |
| 1:231612500           | 0.0218              | 0.3122              | 0.2012              | 0.0858             | -0.0638            | 0.2885             | 0.0655              | -0.0487             | 0.2201              |

|             |        |        |        |         |         |         |         |         |         |
|-------------|--------|--------|--------|---------|---------|---------|---------|---------|---------|
| 1:231617500 | 0.0242 | 0.0353 | 0.0208 | 0.0197  | 0.0048  | 0.0162  | 0.0189  | 0.0046  | 0.0156  |
| 1:231622500 | 0.0017 | 0.0478 | 0.0870 | -0.0202 | 0.0218  | 0.0692  | -0.0188 | 0.0204  | 0.0646  |
| 1:231627500 | 0.1118 | 0.1879 | 0.0575 | 0.1337  | -0.0152 | 0.0744  | 0.1121  | -0.0127 | 0.0623  |
| 1:231632500 | 0.0433 | 0.2673 | 0.1468 | 0.0982  | -0.0540 | 0.2127  | 0.0781  | -0.0429 | 0.1692  |
| 1:231637500 | 0.0364 | 0.3064 | 0.1612 | 0.1136  | -0.0765 | 0.2523  | 0.0881  | -0.0593 | 0.1957  |
| 1:231642500 | 0.1020 | 0.1001 | 0.0142 | 0.0994  | 0.0082  | 0.0061  | 0.0892  | 0.0073  | 0.0055  |
| 1:231647500 | 0.0264 | 0.1722 | 0.0508 | 0.0818  | -0.0551 | 0.1072  | 0.0722  | -0.0485 | 0.0945  |
| 1:231652500 | 0.1029 | 0.2521 | 0.0735 | 0.1614  | -0.0528 | 0.1292  | 0.1304  | -0.0427 | 0.1044  |
| 1:231657500 | 0.0537 | 0.0834 | 0.0966 | 0.0203  | 0.0349  | 0.0667  | 0.0181  | 0.0311  | 0.0595  |
| 1:231662500 | 0.1229 | 0.2103 | 0.1097 | 0.1255  | 0.0056  | 0.1105  | 0.1011  | 0.0045  | 0.0890  |
| 1:231667500 | 0.0352 | 0.0758 | 0.0333 | 0.0404  | -0.0045 | 0.0384  | 0.0376  | -0.0042 | 0.0358  |
| 1:231672500 | 0.0500 | 0.2446 | 0.1476 | 0.0861  | -0.0348 | 0.1945  | 0.0691  | -0.0279 | 0.1561  |
| 1:231677500 | 0.0598 | 0.2844 | 0.0998 | 0.1456  | -0.0839 | 0.1890  | 0.1164  | -0.0671 | 0.1511  |
| 1:231682500 | 0.0661 | 0.1628 | 0.0941 | 0.0736  | -0.0052 | 0.1040  | 0.0628  | -0.0044 | 0.0887  |
| 1:231687500 | 0.0816 | 0.2123 | 0.0907 | 0.1143  | -0.0292 | 0.1243  | 0.0945  | -0.0242 | 0.1028  |
| 1:231692500 | 0.0572 | 0.3238 | 0.1279 | 0.1567  | -0.0978 | 0.2346  | 0.1211  | -0.0756 | 0.1814  |
| 1:231697500 | 0.0490 | 0.2166 | 0.1557 | 0.0626  | -0.0123 | 0.1815  | 0.0508  | -0.0100 | 0.1474  |
| 1:231702500 | 0.0787 | 0.1944 | 0.0810 | 0.1068  | -0.0248 | 0.1094  | 0.0897  | -0.0209 | 0.0918  |
| 1:231707500 | 0.0299 | 0.2061 | 0.1041 | 0.0756  | -0.0452 | 0.1552  | 0.0638  | -0.0381 | 0.1309  |
| 1:231712500 | 0.0214 | 0.1794 | 0.1173 | 0.0473  | -0.0256 | 0.1504  | 0.0403  | -0.0219 | 0.1283  |
| 1:231717500 | 0.0088 | 0.0740 | 0.0624 | 0.0107  | -0.0018 | 0.0662  | 0.0099  | -0.0017 | 0.0615  |
| 1:231722500 | 0.0490 | 0.1078 | 0.1375 | 0.0082  | 0.0420  | 0.1059  | 0.0071  | 0.0364  | 0.0916  |
| 1:231727500 | 0.0656 | 0.1219 | 0.0624 | 0.0667  | 0.0011  | 0.0633  | 0.0590  | 0.0010  | 0.0560  |
| 1:231732500 | 0.1830 | 0.0954 | 0.2194 | 0.0274  | 0.1748  | 0.0729  | 0.0215  | 0.1371  | 0.0572  |
| 1:231737500 | 0.2063 | 0.0518 | 0.2354 | 0.0079  | 0.2231  | 0.0453  | 0.0062  | 0.1748  | 0.0355  |
| 1:231742500 | 0.0839 | 0.0765 | 0.0381 | 0.0642  | 0.0235  | 0.0153  | 0.0582  | 0.0213  | 0.0139  |
| 1:231747500 | 0.2156 | 0.0929 | 0.0226 | 0.1587  | 0.0841  | -0.0612 | 0.1343  | 0.0712  | -0.0518 |
| 1:231752500 | 0.1433 | 0.0707 | 0.0343 | 0.0965  | 0.0581  | -0.0232 | 0.0853  | 0.0514  | -0.0205 |
| 1:231757500 | 0.1676 | 0.1074 | 0.0394 | 0.1284  | 0.0550  | -0.0148 | 0.1099  | 0.0471  | -0.0127 |
| 1:231762500 | 0.0990 | 0.0490 | 0.0169 | 0.0688  | 0.0355  | -0.0185 | 0.0633  | 0.0327  | -0.0170 |
| 1:231767500 | 0.1183 | 0.0600 | 0.0252 | 0.0811  | 0.0447  | -0.0192 | 0.0733  | 0.0404  | -0.0174 |
| 1:231772500 | 0.2024 | 0.0823 | 0.0179 | 0.1470  | 0.0792  | -0.0611 | 0.1262  | 0.0680  | -0.0525 |
| 1:231777500 | 0.1662 | 0.0763 | 0.0168 | 0.1221  | 0.0597  | -0.0428 | 0.1072  | 0.0524  | -0.0375 |
| 1:231782500 | 0.1026 | 0.0635 | 0.0106 | 0.0815  | 0.0267  | -0.0160 | 0.0747  | 0.0244  | -0.0146 |
| 1:231787500 | 0.0369 | 0.0541 | 0.1173 | -0.0158 | 0.0534  | 0.0714  | -0.0142 | 0.0482  | 0.0643  |
| 1:231792500 | 0.1251 | 0.0610 | 0.0224 | 0.0870  | 0.0467  | -0.0240 | 0.0784  | 0.0421  | -0.0217 |
| 1:231797500 | 0.0389 | 0.0347 | 0.0117 | 0.0316  | 0.0081  | 0.0037  | 0.0303  | 0.0077  | 0.0035  |

PBS: population branch statistic. PBS': the modified PBS. HNA: highland Native American. CLM: Colombians from Medellin, Colombia. CEU: Utah Residents with Northern and Western European Ancestry  
<sup>a</sup> Chromosomal position in the middle of sliding window (NCBI build GRCh37)

**Table S8.** Three statistical values (weighted  $F_{ST}$ , PBS, and PBS') in a ~436.3 kb genomic region containing *EGLNI* (a sliding window with 5 kb windows and 5 kb steps), calculated using the estimated allele frequency data of three populations (HNA, CLM, and JPT)

| Position <sup>a</sup> | $F_{ST}$ | $F_{ST}$ | $F_{ST}$ | PBS <sub>JPT</sub> | PBS <sub>CLM</sub> | PBS <sub>HNA</sub> | PBS' <sub>JPT</sub> | PBS' <sub>CLM</sub> | PBS' <sub>HNA</sub> |
|-----------------------|----------|----------|----------|--------------------|--------------------|--------------------|---------------------|---------------------|---------------------|
|                       | JPT-CLM  | JPT-HNA  | CLM-HNA  |                    |                    |                    |                     |                     |                     |
| 1:231367500           | 0.0028   | 0.1342   | 0.1513   | -0.0086            | 0.0114             | 0.1527             | -0.0074             | 0.0098              | 0.1321              |
| 1:231372500           | 0.0111   | 0.0463   | 0.0199   | 0.0192             | -0.0081            | 0.0282             | 0.0185              | -0.0077             | 0.0271              |
| 1:231377500           | -0.0077  | 0.0940   | 0.0793   | 0.0042             | -0.0119            | 0.0945             | 0.0038              | -0.0109             | 0.0870              |
| 1:231382500           | 0.0096   | 0.0487   | 0.0427   | 0.0080             | 0.0016             | 0.0420             | 0.0076              | 0.0015              | 0.0399              |
| 1:231387500           | 0.0125   | 0.0393   | 0.0573   | -0.0031            | 0.0157             | 0.0433             | -0.0030             | 0.0149              | 0.0410              |
| 1:231392500           | 0.0102   | 0.1188   | 0.1350   | -0.0042            | 0.0144             | 0.1306             | -0.0036             | 0.0127              | 0.1145              |
| 1:231397500           | 0.0170   | 0.0387   | 0.0683   | -0.0070            | 0.0242             | 0.0465             | -0.0066             | 0.0227              | 0.0437              |
| 1:231402500           | -0.0032  | 0.0720   | 0.0960   | -0.0147            | 0.0115             | 0.0894             | -0.0135             | 0.0106              | 0.0823              |
| 1:231407500           | 0.0093   | 0.0283   | 0.0408   | -0.0018            | 0.0111             | 0.0305             | -0.0017             | 0.0107              | 0.0293              |
| 1:231412500           | 0.0077   | 0.0600   | 0.0631   | 0.0022             | 0.0055             | 0.0597             | 0.0020              | 0.0052              | 0.0559              |
| 1:231417500           | 0.0178   | 0.0505   | 0.0892   | -0.0119            | 0.0298             | 0.0637             | -0.0110             | 0.0275              | 0.0589              |
| 1:231422500           | 0.0072   | 0.0476   | 0.0459   | 0.0045             | 0.0027             | 0.0443             | 0.0043              | 0.0026              | 0.0421              |
| 1:231427500           | 0.0083   | 0.1180   | 0.0935   | 0.0179             | -0.0095            | 0.1077             | 0.0160              | -0.0085             | 0.0965              |
| 1:231432500           | 0.0213   | 0.0406   | 0.0177   | 0.0226             | -0.0010            | 0.0189             | 0.0217              | -0.0010             | 0.0181              |
| 1:231437500           | 0.0423   | 0.0372   | 0.0965   | -0.0102            | 0.0534             | 0.0481             | -0.0093             | 0.0489              | 0.0441              |
| 1:231442500           | 0.0346   | 0.1384   | 0.0744   | 0.0535             | -0.0183            | 0.0955             | 0.0473              | -0.0161             | 0.0845              |
| 1:231447500           | 0.0531   | 0.0193   | 0.0141   | 0.0299             | 0.0246             | -0.0104            | 0.0287              | 0.0236              | -0.0100             |
| 1:231452500           | 0.0164   | 0.0230   | 0.0220   | 0.0088             | 0.0078             | 0.0145             | 0.0085              | 0.0075              | 0.0140              |
| 1:231457500           | -0.0003  | 0.1015   | 0.0871   | 0.0078             | -0.0081            | 0.0992             | 0.0071              | -0.0073             | 0.0903              |
| 1:231462500           | 0.0017   | 0.1309   | 0.1734   | -0.0242            | 0.0259             | 0.1646             | -0.0208             | 0.0222              | 0.1411              |
| 1:231467500           | 0.0001   | 0.1226   | 0.1410   | -0.0106            | 0.0107             | 0.1413             | -0.0093             | 0.0093              | 0.1238              |
| 1:231472500           | -0.0006  | 0.1062   | 0.1205   | -0.0083            | 0.0078             | 0.1206             | -0.0075             | 0.0070              | 0.1077              |
| 1:231477500           | 0.0031   | 0.1118   | 0.1735   | -0.0345            | 0.0375             | 0.1530             | -0.0298             | 0.0325              | 0.1323              |
| 1:231482500           | 0.0037   | 0.0954   | 0.1325   | -0.0191            | 0.0228             | 0.1194             | -0.0170             | 0.0203              | 0.1063              |
| 1:231487500           | 0.0096   | 0.1232   | 0.1754   | -0.0259            | 0.0355             | 0.1574             | -0.0222             | 0.0304              | 0.1348              |
| 1:231492500           | 0.0032   | 0.1306   | 0.1767   | -0.0256            | 0.0288             | 0.1656             | -0.0219             | 0.0247              | 0.1417              |
| 1:231497500           | -0.0041  | 0.1302   | 0.1626   | -0.0210            | 0.0169             | 0.1606             | -0.0182             | 0.0146              | 0.1388              |
| 1:231502500           | -0.0011  | 0.1835   | 0.1987   | -0.0099            | 0.0089             | 0.2126             | -0.0082             | 0.0073              | 0.1755              |
| 1:231507500           | 0.0053   | 0.1542   | 0.1801   | -0.0129            | 0.0182             | 0.1804             | -0.0109             | 0.0154              | 0.1521              |
| 1:231512500           | 0.0011   | 0.1474   | 0.1934   | -0.0272            | 0.0283             | 0.1867             | -0.0229             | 0.0238              | 0.1572              |
| 1:231517500           | -0.0022  | 0.1523   | 0.1922   | -0.0252            | 0.0230             | 0.1904             | -0.0212             | 0.0194              | 0.1603              |
| 1:231522500           | -0.0017  | 0.1315   | 0.1644   | -0.0202            | 0.0184             | 0.1612             | -0.0174             | 0.0159              | 0.1390              |
| 1:231527500           | 0.0060   | 0.1365   | 0.1566   | -0.0088            | 0.0148             | 0.1555             | -0.0076             | 0.0128              | 0.1339              |
| 1:231532500           | 0.0007   | 0.1450   | 0.1855   | -0.0239            | 0.0247             | 0.1806             | -0.0203             | 0.0209              | 0.1528              |
| 1:231537500           | 0.0044   | 0.1435   | 0.2010   | -0.0325            | 0.0369             | 0.1874             | -0.0273             | 0.0310              | 0.1573              |
| 1:231542500           | 0.0622   | 0.1243   | 0.1841   | -0.0033            | 0.0675             | 0.1360             | -0.0027             | 0.0562              | 0.1133              |
| 1:231547500           | 0.0647   | 0.1953   | 0.2276   | 0.0130             | 0.0540             | 0.2043             | 0.0102              | 0.0424              | 0.1607              |
| 1:231552500           | 0.0748   | 0.0964   | 0.1511   | 0.0076             | 0.0701             | 0.0938             | 0.0065              | 0.0598              | 0.0800              |
| 1:231557500           | 0.0581   | 0.1575   | 0.0737   | 0.0773             | -0.0175            | 0.0941             | 0.0670              | -0.0151             | 0.0815              |
| 1:231562500           | 0.1020   | 0.3151   | 0.1632   | 0.1539             | -0.0464            | 0.2245             | 0.1155              | -0.0348             | 0.1685              |
| 1:231567500           | 0.0375   | 0.2291   | 0.0804   | 0.1073             | -0.0691            | 0.1529             | 0.0901              | -0.0580             | 0.1283              |
| 1:231572500           | 0.0572   | 0.1908   | 0.0700   | 0.0990             | -0.0402            | 0.1127             | 0.0845              | -0.0343             | 0.0962              |
| 1:231577500           | 0.1294   | 0.3791   | 0.1346   | 0.2353             | -0.0967            | 0.2413             | 0.1705              | -0.0701             | 0.1749              |
| 1:231582500           | 0.1007   | 0.3650   | 0.1340   | 0.2082             | -0.1021            | 0.2460             | 0.1540              | -0.0755             | 0.1819              |
| 1:231587500           | 0.0908   | 0.3708   | 0.2197   | 0.1552             | -0.0600            | 0.3080             | 0.1106              | -0.0427             | 0.2195              |
| 1:231592500           | 0.0875   | 0.3414   | 0.1754   | 0.1582             | -0.0666            | 0.2594             | 0.1171              | -0.0493             | 0.1920              |
| 1:231597500           | 0.0933   | 0.3445   | 0.1347   | 0.1878             | -0.0899            | 0.2346             | 0.1409              | -0.0675             | 0.1760              |
| 1:231602500           | 0.0488   | 0.1909   | 0.1107   | 0.0723             | -0.0222            | 0.1395             | 0.0607              | -0.0186             | 0.1173              |
| 1:231607500           | 0.0662   | 0.2009   | 0.0685   | 0.1109             | -0.0424            | 0.1134             | 0.0938              | -0.0359             | 0.0959              |
| 1:231612500           | 0.0218   | 0.3122   | 0.2012   | 0.0858             | -0.0638            | 0.2885             | 0.0655              | -0.0487             | 0.2201              |

|             |        |        |        |         |         |         |         |         |         |
|-------------|--------|--------|--------|---------|---------|---------|---------|---------|---------|
| 1:231617500 | 0.0242 | 0.0353 | 0.0208 | 0.0197  | 0.0048  | 0.0162  | 0.0189  | 0.0046  | 0.0156  |
| 1:231622500 | 0.0017 | 0.0478 | 0.0870 | -0.0202 | 0.0218  | 0.0692  | -0.0188 | 0.0204  | 0.0646  |
| 1:231627500 | 0.1118 | 0.1879 | 0.0575 | 0.1337  | -0.0152 | 0.0744  | 0.1121  | -0.0127 | 0.0623  |
| 1:231632500 | 0.0433 | 0.2673 | 0.1468 | 0.0982  | -0.0540 | 0.2127  | 0.0781  | -0.0429 | 0.1692  |
| 1:231637500 | 0.0364 | 0.3064 | 0.1612 | 0.1136  | -0.0765 | 0.2523  | 0.0881  | -0.0593 | 0.1957  |
| 1:231642500 | 0.1020 | 0.1001 | 0.0142 | 0.0994  | 0.0082  | 0.0061  | 0.0892  | 0.0073  | 0.0055  |
| 1:231647500 | 0.0264 | 0.1722 | 0.0508 | 0.0818  | -0.0551 | 0.1072  | 0.0722  | -0.0485 | 0.0945  |
| 1:231652500 | 0.1029 | 0.2521 | 0.0735 | 0.1614  | -0.0528 | 0.1292  | 0.1304  | -0.0427 | 0.1044  |
| 1:231657500 | 0.0537 | 0.0834 | 0.0966 | 0.0203  | 0.0349  | 0.0667  | 0.0181  | 0.0311  | 0.0595  |
| 1:231662500 | 0.1229 | 0.2103 | 0.1097 | 0.1255  | 0.0056  | 0.1105  | 0.1011  | 0.0045  | 0.0890  |
| 1:231667500 | 0.0352 | 0.0758 | 0.0333 | 0.0404  | -0.0045 | 0.0384  | 0.0376  | -0.0042 | 0.0358  |
| 1:231672500 | 0.0500 | 0.2446 | 0.1476 | 0.0861  | -0.0348 | 0.1945  | 0.0691  | -0.0279 | 0.1561  |
| 1:231677500 | 0.0598 | 0.2844 | 0.0998 | 0.1456  | -0.0839 | 0.1890  | 0.1164  | -0.0671 | 0.1511  |
| 1:231682500 | 0.0661 | 0.1628 | 0.0941 | 0.0736  | -0.0052 | 0.1040  | 0.0628  | -0.0044 | 0.0887  |
| 1:231687500 | 0.0816 | 0.2123 | 0.0907 | 0.1143  | -0.0292 | 0.1243  | 0.0945  | -0.0242 | 0.1028  |
| 1:231692500 | 0.0572 | 0.3238 | 0.1279 | 0.1567  | -0.0978 | 0.2346  | 0.1211  | -0.0756 | 0.1814  |
| 1:231697500 | 0.0490 | 0.2166 | 0.1557 | 0.0626  | -0.0123 | 0.1815  | 0.0508  | -0.0100 | 0.1474  |
| 1:231702500 | 0.0787 | 0.1944 | 0.0810 | 0.1068  | -0.0248 | 0.1094  | 0.0897  | -0.0209 | 0.0918  |
| 1:231707500 | 0.0299 | 0.2061 | 0.1041 | 0.0756  | -0.0452 | 0.1552  | 0.0638  | -0.0381 | 0.1309  |
| 1:231712500 | 0.0214 | 0.1794 | 0.1173 | 0.0473  | -0.0256 | 0.1504  | 0.0403  | -0.0219 | 0.1283  |
| 1:231717500 | 0.0088 | 0.0740 | 0.0624 | 0.0107  | -0.0018 | 0.0662  | 0.0099  | -0.0017 | 0.0615  |
| 1:231722500 | 0.0490 | 0.1078 | 0.1375 | 0.0082  | 0.0420  | 0.1059  | 0.0071  | 0.0364  | 0.0916  |
| 1:231727500 | 0.0656 | 0.1219 | 0.0624 | 0.0667  | 0.0011  | 0.0633  | 0.0590  | 0.0010  | 0.0560  |
| 1:231732500 | 0.1830 | 0.0954 | 0.2194 | 0.0274  | 0.1748  | 0.0729  | 0.0215  | 0.1371  | 0.0572  |
| 1:231737500 | 0.2063 | 0.0518 | 0.2354 | 0.0079  | 0.2231  | 0.0453  | 0.0062  | 0.1748  | 0.0355  |
| 1:231742500 | 0.0839 | 0.0765 | 0.0381 | 0.0642  | 0.0235  | 0.0153  | 0.0582  | 0.0213  | 0.0139  |
| 1:231747500 | 0.2156 | 0.0929 | 0.0226 | 0.1587  | 0.0841  | -0.0612 | 0.1343  | 0.0712  | -0.0518 |
| 1:231752500 | 0.1433 | 0.0707 | 0.0343 | 0.0965  | 0.0581  | -0.0232 | 0.0853  | 0.0514  | -0.0205 |
| 1:231757500 | 0.1676 | 0.1074 | 0.0394 | 0.1284  | 0.0550  | -0.0148 | 0.1099  | 0.0471  | -0.0127 |
| 1:231762500 | 0.0990 | 0.0490 | 0.0169 | 0.0688  | 0.0355  | -0.0185 | 0.0633  | 0.0327  | -0.0170 |
| 1:231767500 | 0.1183 | 0.0600 | 0.0252 | 0.0811  | 0.0447  | -0.0192 | 0.0733  | 0.0404  | -0.0174 |
| 1:231772500 | 0.2024 | 0.0823 | 0.0179 | 0.1470  | 0.0792  | -0.0611 | 0.1262  | 0.0680  | -0.0525 |
| 1:231777500 | 0.1662 | 0.0763 | 0.0168 | 0.1221  | 0.0597  | -0.0428 | 0.1072  | 0.0524  | -0.0375 |
| 1:231782500 | 0.1026 | 0.0635 | 0.0106 | 0.0815  | 0.0267  | -0.0160 | 0.0747  | 0.0244  | -0.0146 |
| 1:231787500 | 0.0369 | 0.0541 | 0.1173 | -0.0158 | 0.0534  | 0.0714  | -0.0142 | 0.0482  | 0.0643  |
| 1:231792500 | 0.1251 | 0.0610 | 0.0224 | 0.0870  | 0.0467  | -0.0240 | 0.0784  | 0.0421  | -0.0217 |
| 1:231797500 | 0.0389 | 0.0347 | 0.0117 | 0.0316  | 0.0081  | 0.0037  | 0.0303  | 0.0077  | 0.0035  |

PBS: population branch statistic. PBS': the modified PBS. HNA: highland Native American. CLM: Colombians from Medellin, Colombia. JPT: Japanese in Tokyo, Japan

<sup>a</sup> Chromosomal position in the middle of sliding window (NCBI build GRCh37)

**Table S9.** Three statistical values (weighted  $F_{ST}$ , PBS, and PBS') in a ~436.3 kb genomic region containing *EGLN1* (a sliding window with 5 kb windows and 5 kb steps), calculated using the estimated allele frequency data of three populations (HNA, CLM, and YRI)

| Position <sup>a</sup> | $F_{ST}$<br>YRI-CLM | $F_{ST}$<br>YRI-HNA | $F_{ST}$<br>CLM-HNA | PBS <sub>YRI</sub> | PBS <sub>CLM</sub> | PBS <sub>HNA</sub> | PBS' <sub>YRI</sub> | PBS' <sub>CLM</sub> | PBS' <sub>HNA</sub> |
|-----------------------|---------------------|---------------------|---------------------|--------------------|--------------------|--------------------|---------------------|---------------------|---------------------|
| 1:231367500           | 0.0179              | 0.2287              | 0.1577              | 0.0531             | -0.0350            | 0.2066             | 0.0433              | -0.0286             | 0.1687              |
| 1:231372500           | 0.0376              | 0.0611              | 0.0049              | 0.0482             | -0.0098            | 0.0148             | 0.0458              | -0.0094             | 0.0140              |
| 1:231377500           | 0.0197              | 0.1447              | 0.0837              | 0.0443             | -0.0245            | 0.1119             | 0.0392              | -0.0216             | 0.0989              |
| 1:231382500           | 0.0198              | 0.0790              | 0.0582              | 0.0212             | -0.0012            | 0.0612             | 0.0196              | -0.0011             | 0.0566              |
| 1:231387500           | 0.0122              | 0.0985              | 0.0491              | 0.0328             | -0.0205            | 0.0709             | 0.0303              | -0.0190             | 0.0654              |
| 1:231392500           | 0.0147              | 0.1747              | 0.1403              | 0.0278             | -0.0130            | 0.1642             | 0.0236              | -0.0110             | 0.1393              |
| 1:231397500           | 0.0071              | 0.0856              | 0.0777              | 0.0079             | -0.0008            | 0.0817             | 0.0072              | -0.0007             | 0.0750              |
| 1:231402500           | 0.0069              | 0.1344              | 0.0932              | 0.0267             | -0.0198            | 0.1176             | 0.0237              | -0.0176             | 0.1046              |
| 1:231407500           | 0.0079              | 0.0925              | 0.0749              | 0.0136             | -0.0057            | 0.0835             | 0.0124              | -0.0052             | 0.0765              |
| 1:231412500           | 0.0202              | 0.1394              | 0.0497              | 0.0598             | -0.0394            | 0.0903             | 0.0538              | -0.0355             | 0.0813              |
| 1:231417500           | 0.0141              | 0.1106              | 0.0918              | 0.0176             | -0.0034            | 0.0997             | 0.0158              | -0.0030             | 0.0895              |
| 1:231422500           | 0.0508              | 0.0945              | 0.0313              | 0.0598             | -0.0077            | 0.0395             | 0.0548              | -0.0070             | 0.0362              |
| 1:231427500           | 0.0674              | 0.1724              | 0.1242              | 0.0632             | 0.0066             | 0.1260             | 0.0528              | 0.0055              | 0.1054              |
| 1:231432500           | 0.0839              | 0.1787              | 0.0189              | 0.1327             | -0.0451            | 0.0641             | 0.1152              | -0.0391             | 0.0556              |
| 1:231437500           | 0.0782              | 0.1549              | 0.0621              | 0.0928             | -0.0114            | 0.0755             | 0.0802              | -0.0099             | 0.0653              |
| 1:231442500           | 0.0601              | 0.1896              | 0.0760              | 0.0966             | -0.0346            | 0.1136             | 0.0822              | -0.0294             | 0.0967              |
| 1:231447500           | 0.0277              | 0.0592              | 0.0193              | 0.0348             | -0.0067            | 0.0262             | 0.0330              | -0.0063             | 0.0249              |
| 1:231452500           | 0.0459              | 0.1500              | 0.0248              | 0.0922             | -0.0452            | 0.0703             | 0.0825              | -0.0404             | 0.0629              |
| 1:231457500           | 0.0617              | 0.1548              | 0.1199              | 0.0521             | 0.0116             | 0.1161             | 0.0442              | 0.0098              | 0.0984              |
| 1:231462500           | 0.1145              | 0.1545              | 0.1883              | 0.0404             | 0.0812             | 0.1274             | 0.0323              | 0.0650              | 0.1020              |
| 1:231467500           | 0.0325              | 0.0676              | 0.1385              | -0.0230            | 0.0561             | 0.0931             | -0.0204             | 0.0498              | 0.0826              |
| 1:231472500           | 0.0432              | 0.0214              | 0.1288              | -0.0360            | 0.0802             | 0.0576             | -0.0327             | 0.0728              | 0.0523              |
| 1:231477500           | 0.0195              | 0.1630              | 0.2270              | -0.0299            | 0.0496             | 0.2078             | -0.0244             | 0.0404              | 0.1693              |
| 1:231482500           | 0.0206              | 0.0780              | 0.1322              | -0.0198            | 0.0407             | 0.1011             | -0.0177             | 0.0363              | 0.0901              |
| 1:231487500           | 0.0251              | 0.0932              | 0.1537              | -0.0218            | 0.0472             | 0.1196             | -0.0190             | 0.0412              | 0.1045              |
| 1:231492500           | 0.0444              | 0.0682              | 0.1815              | -0.0421            | 0.0876             | 0.1128             | -0.0364             | 0.0756              | 0.0974              |
| 1:231497500           | 0.0776              | 0.0219              | 0.1558              | -0.0332            | 0.1140             | 0.0554             | -0.0292             | 0.1003              | 0.0487              |
| 1:231502500           | 0.0433              | 0.1416              | 0.2490              | -0.0447            | 0.0890             | 0.1974             | -0.0360             | 0.0717              | 0.1590              |
| 1:231507500           | 0.0499              | 0.0614              | 0.1830              | -0.0438            | 0.0949             | 0.1072             | -0.0378             | 0.0820              | 0.0925              |
| 1:231512500           | 0.0697              | 0.0262              | 0.1739              | -0.0461            | 0.1184             | 0.0727             | -0.0403             | 0.1034              | 0.0635              |
| 1:231517500           | 0.0667              | 0.0112              | 0.1653              | -0.0502            | 0.1193             | 0.0614             | -0.0444             | 0.1055              | 0.0543              |
| 1:231522500           | 0.0519              | 0.0251              | 0.1570              | -0.0461            | 0.0994             | 0.0715             | -0.0410             | 0.0883              | 0.0635              |
| 1:231527500           | 0.0601              | 0.0171              | 0.1521              | -0.0429            | 0.1049             | 0.0601             | -0.0382             | 0.0935              | 0.0536              |
| 1:231532500           | 0.0494              | 0.0690              | 0.1934              | -0.0463            | 0.0970             | 0.1179             | -0.0397             | 0.0830              | 0.1009              |
| 1:231537500           | 0.0642              | 0.0303              | 0.1849              | -0.0536            | 0.1200             | 0.0844             | -0.0466             | 0.1043              | 0.0733              |
| 1:231542500           | 0.0261              | 0.1318              | 0.1863              | -0.0192            | 0.0456             | 0.1606             | -0.0162             | 0.0384              | 0.1353              |
| 1:231547500           | 0.0300              | 0.1508              | 0.1948              | -0.0114            | 0.0418             | 0.1748             | -0.0094             | 0.0347              | 0.1451              |
| 1:231552500           | 0.0369              | 0.1285              | 0.1880              | -0.0166            | 0.0542             | 0.1541             | -0.0139             | 0.0455              | 0.1293              |
| 1:231557500           | 0.0229              | 0.1326              | 0.0893              | 0.0359             | -0.0128            | 0.1064             | 0.0318              | -0.0113             | 0.0942              |
| 1:231562500           | 0.0442              | 0.2746              | 0.1850              | 0.0809             | -0.0356            | 0.2401             | 0.0629              | -0.0277             | 0.1868              |
| 1:231567500           | 0.0414              | 0.1500              | 0.1007              | 0.0494             | -0.0071            | 0.1132             | 0.0427              | -0.0061             | 0.0979              |
| 1:231572500           | 0.0237              | 0.0432              | 0.0882              | -0.0121            | 0.0361             | 0.0562             | -0.0112             | 0.0334              | 0.0520              |
| 1:231577500           | 0.0083              | 0.1356              | 0.1515              | -0.0051            | 0.0134             | 0.1508             | -0.0044             | 0.0116              | 0.1301              |
| 1:231582500           | 0.0104              | 0.1148              | 0.1362              | -0.0070            | 0.0175             | 0.1290             | -0.0061             | 0.0153              | 0.1132              |
| 1:231587500           | 0.0056              | 0.2091              | 0.2174              | -0.0025            | 0.0081             | 0.2370             | -0.0020             | 0.0065              | 0.1907              |
| 1:231592500           | 0.0038              | 0.1773              | 0.1989              | -0.0114            | 0.0152             | 0.2065             | -0.0094             | 0.0126              | 0.1706              |
| 1:231597500           | 0.0262              | 0.1678              | 0.1364              | 0.0319             | -0.0053            | 0.1519             | 0.0270              | -0.0045             | 0.1289              |
| 1:231602500           | 0.0142              | 0.1024              | 0.1114              | 0.0021             | 0.0122             | 0.1060             | 0.0019              | 0.0109              | 0.0946              |
| 1:231607500           | 0.0476              | 0.1119              | 0.0638              | 0.0507             | -0.0020            | 0.0679             | 0.0454              | -0.0018             | 0.0608              |
| 1:231612500           | 0.0425              | 0.1506              | 0.1196              | 0.0397             | 0.0038             | 0.1235             | 0.0340              | 0.0033              | 0.1058              |

|             |        |        |        |         |         |        |         |         |        |
|-------------|--------|--------|--------|---------|---------|--------|---------|---------|--------|
| 1:231617500 | 0.0471 | 0.0917 | 0.0185 | 0.0629  | -0.0146 | 0.0333 | 0.0581  | -0.0135 | 0.0308 |
| 1:231622500 | 0.0195 | 0.0351 | 0.0602 | -0.0033 | 0.0230  | 0.0390 | -0.0031 | 0.0218  | 0.0369 |
| 1:231627500 | 0.1002 | 0.1985 | 0.0805 | 0.1215  | -0.0159 | 0.0998 | 0.1008  | -0.0132 | 0.0828 |
| 1:231632500 | 0.0418 | 0.2801 | 0.1365 | 0.1123  | -0.0696 | 0.2164 | 0.0892  | -0.0553 | 0.1719 |
| 1:231637500 | 0.0431 | 0.1980 | 0.1551 | 0.0481  | -0.0040 | 0.1726 | 0.0395  | -0.0033 | 0.1419 |
| 1:231642500 | 0.0305 | 0.0467 | 0.0205 | 0.0290  | 0.0019  | 0.0188 | 0.0277  | 0.0018  | 0.0179 |
| 1:231647500 | 0.0468 | 0.1275 | 0.0736 | 0.0539  | -0.0060 | 0.0824 | 0.0477  | -0.0053 | 0.0729 |
| 1:231652500 | 0.0329 | 0.1328 | 0.0785 | 0.0471  | -0.0136 | 0.0954 | 0.0417  | -0.0121 | 0.0845 |
| 1:231657500 | 0.0333 | 0.0521 | 0.0926 | -0.0049 | 0.0388  | 0.0584 | -0.0045 | 0.0355  | 0.0535 |
| 1:231662500 | 0.0479 | 0.1852 | 0.1666 | 0.0358  | 0.0133  | 0.1690 | 0.0294  | 0.0109  | 0.1387 |
| 1:231667500 | 0.0380 | 0.0435 | 0.0801 | -0.0001 | 0.0389  | 0.0446 | -0.0001 | 0.0359  | 0.0411 |
| 1:231672500 | 0.0498 | 0.1787 | 0.0654 | 0.0901  | -0.0391 | 0.1067 | 0.0779  | -0.0337 | 0.0922 |
| 1:231677500 | 0.0479 | 0.2304 | 0.1209 | 0.0911  | -0.0420 | 0.1709 | 0.0747  | -0.0344 | 0.1401 |
| 1:231682500 | 0.0463 | 0.1571 | 0.1419 | 0.0326  | 0.0148  | 0.1383 | 0.0275  | 0.0125  | 0.1166 |
| 1:231687500 | 0.0728 | 0.1798 | 0.1244 | 0.0705  | 0.0051  | 0.1278 | 0.0586  | 0.0042  | 0.1062 |
| 1:231692500 | 0.0484 | 0.2265 | 0.1325 | 0.0822  | -0.0325 | 0.1747 | 0.0671  | -0.0265 | 0.1427 |
| 1:231697500 | 0.0365 | 0.1242 | 0.1189 | 0.0216  | 0.0156  | 0.1110 | 0.0188  | 0.0136  | 0.0967 |
| 1:231702500 | 0.0525 | 0.1034 | 0.0885 | 0.0352  | 0.0187  | 0.0740 | 0.0312  | 0.0166  | 0.0656 |
| 1:231707500 | 0.0497 | 0.1692 | 0.1165 | 0.0562  | -0.0053 | 0.1292 | 0.0476  | -0.0045 | 0.1095 |
| 1:231712500 | 0.0821 | 0.1779 | 0.1110 | 0.0820  | 0.0037  | 0.1139 | 0.0684  | 0.0031  | 0.0950 |
| 1:231717500 | 0.0565 | 0.0621 | 0.0907 | 0.0136  | 0.0446  | 0.0505 | 0.0122  | 0.0402  | 0.0455 |
| 1:231722500 | 0.0816 | 0.0238 | 0.1610 | -0.0332 | 0.1183  | 0.0573 | -0.0291 | 0.1035  | 0.0502 |
| 1:231727500 | 0.0414 | 0.1164 | 0.0665 | 0.0486  | -0.0063 | 0.0751 | 0.0435  | -0.0057 | 0.0672 |
| 1:231732500 | 0.0899 | 0.1254 | 0.2200 | -0.0102 | 0.1043  | 0.1442 | -0.0082 | 0.0842  | 0.1164 |
| 1:231737500 | 0.0169 | 0.1474 | 0.2787 | -0.0751 | 0.0921  | 0.2346 | -0.0600 | 0.0736  | 0.1874 |
| 1:231742500 | 0.0254 | 0.0829 | 0.0756 | 0.0168  | 0.0090  | 0.0697 | 0.0153  | 0.0082  | 0.0636 |
| 1:231747500 | 0.0357 | 0.0432 | 0.0094 | 0.0355  | 0.0008  | 0.0087 | 0.0340  | 0.0008  | 0.0083 |
| 1:231752500 | 0.0368 | 0.0483 | 0.0344 | 0.0260  | 0.0115  | 0.0235 | 0.0245  | 0.0108  | 0.0221 |
| 1:231757500 | 0.0656 | 0.1069 | 0.0419 | 0.0690  | -0.0012 | 0.0440 | 0.0621  | -0.0011 | 0.0396 |
| 1:231762500 | 0.0923 | 0.1397 | 0.0266 | 0.1102  | -0.0133 | 0.0403 | 0.0969  | -0.0117 | 0.0354 |
| 1:231767500 | 0.0777 | 0.1260 | 0.0220 | 0.0966  | -0.0158 | 0.0381 | 0.0864  | -0.0141 | 0.0340 |
| 1:231772500 | 0.0395 | 0.1506 | 0.0041 | 0.0997  | -0.0594 | 0.0635 | 0.0903  | -0.0538 | 0.0575 |
| 1:231777500 | 0.0394 | 0.1042 | 0.0328 | 0.0584  | -0.0183 | 0.0516 | 0.0535  | -0.0167 | 0.0473 |
| 1:231782500 | 0.0658 | 0.0732 | 0.0099 | 0.0671  | 0.0010  | 0.0089 | 0.0623  | 0.0009  | 0.0083 |
| 1:231787500 | 0.0797 | 0.2680 | 0.1759 | 0.1008  | -0.0177 | 0.2112 | 0.0779  | -0.0137 | 0.1632 |
| 1:231792500 | 0.1060 | 0.1353 | 0.0206 | 0.1183  | -0.0062 | 0.0271 | 0.1038  | -0.0055 | 0.0237 |
| 1:231797500 | 0.1041 | 0.1593 | 0.0359 | 0.1234  | -0.0135 | 0.0501 | 0.1064  | -0.0116 | 0.0432 |

PBS: population branch statistic. PBS': the modified PBS. HNA: highland Native American. CLM: Colombians from Medellin, Colombia. YRI: Yoruba in Ibadan, Nigeria

<sup>a</sup> Chromosomal position in the middle of sliding window (NCBI build GRCh37)



**Table S10.** PBS' in a ~436.3 kb genomic region located 1 Mb upstream of *EGLNI* (a sliding window with 5 kb windows and 5 kb steps), calculated using the estimated allele frequency data for two population triplets (HNA, CLM, and JPT or CEU)

| Position <sup>a</sup> | CLM-HNA-JPT         |                     |                     | CLM-HNA-CEU         |                     |                     |
|-----------------------|---------------------|---------------------|---------------------|---------------------|---------------------|---------------------|
|                       | PBS' <sub>JPT</sub> | PBS' <sub>CLM</sub> | PBS' <sub>HNA</sub> | PBS' <sub>CEU</sub> | PBS' <sub>CLM</sub> | PBS' <sub>HNA</sub> |
| 1:229932500           | 0.0462              | -0.0375             | 0.2284              | -0.0100             | 0.0109              | 0.1795              |
| 1:229937500           | 0.0745              | -0.0631             | 0.3022              | -0.0061             | 0.0023              | 0.2676              |
| 1:229942500           | 0.0285              | -0.0268             | 0.2006              | -0.0177             | 0.0214              | 0.1876              |
| 1:229947500           | 0.0405              | -0.0346             | 0.2263              | 0.0069              | -0.0084             | 0.2051              |
| 1:229952500           | 0.0294              | -0.0319             | 0.3104              | 0.0054              | -0.0054             | 0.2644              |
| 1:229957500           | 0.0436              | -0.0341             | 0.2370              | -0.0042             | 0.0010              | 0.2156              |
| 1:229962500           | -0.0076             | 0.0128              | 0.0096              | 0.0156              | -0.0093             | 0.0188              |
| 1:229967500           | 0.0333              | -0.0313             | 0.2616              | 0.0262              | -0.0289             | 0.2652              |
| 1:229972500           | 0.0457              | -0.0407             | 0.2761              | 0.0222              | -0.0231             | 0.2584              |
| 1:229977500           | 0.0361              | -0.0395             | 0.3782              | -0.0306             | 0.0289              | 0.3602              |
| 1:229982500           | 0.0499              | -0.0447             | 0.2706              | 0.0242              | -0.0230             | 0.2381              |
| 1:229987500           | 0.0002              | 0.0454              | 0.0082              | -0.0092             | 0.0350              | 0.0133              |
| 1:229992500           | 0.0343              | -0.0123             | 0.0388              | 0.0165              | -0.0015             | 0.0515              |
| 1:229997500           | 0.0630              | -0.0316             | 0.0657              | 0.0306              | -0.0224             | 0.0615              |
| 1:230002500           | 0.0202              | -0.0016             | 0.0268              | 0.0203              | -0.0079             | 0.0434              |
| 1:230007500           | 0.0055              | 0.0209              | 0.0027              | -0.0059             | 0.0185              | 0.0091              |
| 1:230012500           | 0.0029              | 0.0259              | 0.0176              | 0.0070              | 0.0124              | 0.0350              |
| 1:230017500           | 0.0083              | 0.0225              | -0.0063             | 0.0081              | -0.0008             | 0.0239              |
| 1:230022500           | 0.0959              | -0.0432             | 0.0665              | 0.0054              | -0.0053             | 0.0235              |
| 1:230027500           | 0.0011              | 0.0138              | 0.0111              | 0.0081              | -0.0018             | 0.0127              |
| 1:230032500           | 0.0825              | -0.0669             | 0.1530              | 0.0632              | -0.0483             | 0.1771              |
| 1:230037500           | 0.0051              | 0.0337              | 0.0233              | 0.0093              | -0.0128             | 0.0741              |
| 1:230042500           | -0.0042             | 0.0223              | 0.0037              | -0.0057             | 0.0009              | 0.0141              |
| 1:230047500           | -0.0009             | 0.0166              | -0.0049             | -0.0057             | 0.0017              | 0.0159              |
| 1:230052500           | -0.0038             | 0.0567              | 0.0316              | -0.0190             | 0.0307              | 0.0726              |
| 1:230057500           | -0.0090             | 0.0290              | 0.0071              | -0.0124             | 0.0212              | 0.0185              |
| 1:230062500           | 0.0447              | -0.0044             | 0.0303              | -0.0124             | 0.0165              | 0.0284              |
| 1:230067500           | -0.0005             | 0.0345              | 0.0104              | -0.0208             | 0.0334              | 0.0359              |
| 1:230072500           | -0.0001             | 0.0101              | 0.0079              | 0.0047              | -0.0003             | 0.0195              |
| 1:230077500           | 0.0093              | 0.0023              | 0.0136              | 0.0015              | 0.0082              | 0.0258              |
| 1:230082500           | 0.0178              | 0.0034              | 0.0444              | -0.0079             | 0.0042              | 0.0497              |
| 1:230087500           | 0.0029              | -0.0024             | 0.0348              | 0.0019              | -0.0021             | 0.0429              |
| 1:230092500           | -0.0135             | 0.0082              | 0.0395              | -0.0092             | 0.0052              | 0.0355              |
| 1:230097500           | -0.0124             | 0.0117              | 0.0402              | -0.0087             | 0.0094              | 0.0340              |
| 1:230102500           | -0.0063             | 0.0051              | 0.0095              | -0.0020             | -0.0024             | 0.0276              |
| 1:230107500           | 0.0093              | -0.0068             | 0.1213              | 0.0043              | -0.0034             | 0.1422              |
| 1:230112500           | -0.0054             | 0.0071              | 0.0700              | 0.0175              | -0.0138             | 0.1088              |
| 1:230117500           | -0.0015             | 0.0110              | 0.0181              | 0.0003              | 0.0041              | 0.0126              |
| 1:230122500           | 0.0219              | -0.0045             | 0.0749              | 0.0358              | -0.0291             | 0.1271              |
| 1:230127500           | -0.0060             | 0.0178              | 0.0033              | 0.0108              | -0.0121             | 0.0282              |
| 1:230132500           | 0.0162              | -0.0004             | 0.0801              | 0.0000              | -0.0009             | 0.0857              |
| 1:230137500           | 0.0377              | -0.0050             | 0.0306              | -0.0001             | -0.0011             | 0.0280              |
| 1:230142500           | 0.0361              | -0.0116             | 0.0348              | -0.0018             | -0.0026             | 0.0287              |
| 1:230147500           | 0.0166              | 0.0126              | 0.0297              | -0.0041             | 0.0070              | 0.0413              |

|             |         |         |         |         |         |        |
|-------------|---------|---------|---------|---------|---------|--------|
| 1:230152500 | -0.0010 | 0.0041  | 0.0366  | -0.0066 | 0.0015  | 0.0282 |
| 1:230157500 | 0.0343  | -0.0073 | 0.0257  | 0.0033  | -0.0012 | 0.0219 |
| 1:230162500 | 0.0338  | -0.0077 | 0.0211  | 0.0020  | -0.0039 | 0.0348 |
| 1:230167500 | 0.0150  | -0.0094 | 0.2114  | 0.0161  | -0.0084 | 0.1994 |
| 1:230172500 | 0.0240  | -0.0167 | 0.0331  | 0.0029  | -0.0066 | 0.0203 |
| 1:230177500 | 0.0389  | -0.0022 | 0.0223  | 0.0046  | -0.0037 | 0.0220 |
| 1:230182500 | 0.0156  | -0.0089 | 0.0533  | -0.0006 | -0.0014 | 0.0660 |
| 1:230187500 | 0.0352  | -0.0162 | 0.0607  | 0.0076  | -0.0057 | 0.0587 |
| 1:230192500 | 0.0315  | -0.0213 | 0.0498  | 0.0003  | -0.0028 | 0.0470 |
| 1:230197500 | 0.0377  | -0.0072 | 0.0266  | 0.0074  | -0.0037 | 0.0337 |
| 1:230202500 | 0.0570  | 0.0092  | 0.0003  | 0.0033  | -0.0017 | 0.0084 |
| 1:230207500 | 0.0405  | -0.0024 | 0.0097  | 0.0052  | -0.0011 | 0.0062 |
| 1:230212500 | 0.0627  | -0.0112 | 0.1104  | 0.0588  | -0.0420 | 0.1339 |
| 1:230217500 | 0.0648  | -0.0113 | 0.1280  | 0.0322  | -0.0202 | 0.1588 |
| 1:230222500 | 0.0181  | -0.0041 | 0.1056  | 0.0323  | -0.0195 | 0.1286 |
| 1:230227500 | 0.0318  | 0.0175  | 0.0917  | 0.0009  | -0.0031 | 0.1218 |
| 1:230232500 | 0.0408  | -0.0149 | 0.0847  | 0.0115  | -0.0118 | 0.0925 |
| 1:230237500 | 0.0280  | -0.0190 | 0.1118  | 0.0130  | -0.0172 | 0.1206 |
| 1:230242500 | 0.0724  | -0.0399 | 0.1470  | 0.0138  | -0.0167 | 0.1366 |
| 1:230247500 | 0.0387  | -0.0223 | 0.0832  | 0.0009  | -0.0067 | 0.0794 |
| 1:230252500 | 0.0354  | -0.0256 | 0.1030  | 0.0130  | -0.0158 | 0.1059 |
| 1:230257500 | 0.0754  | -0.0078 | 0.0874  | 0.0224  | -0.0206 | 0.0904 |
| 1:230262500 | 0.0272  | 0.0077  | 0.0813  | 0.0408  | -0.0357 | 0.1200 |
| 1:230267500 | 0.0060  | 0.0156  | 0.0877  | 0.0275  | -0.0164 | 0.1227 |
| 1:230272500 | 0.0241  | -0.0081 | 0.0920  | 0.0402  | -0.0264 | 0.1185 |
| 1:230277500 | 0.2312  | -0.0193 | 0.0462  | 0.0307  | -0.0210 | 0.0522 |
| 1:230282500 | 0.1961  | 0.0232  | -0.0191 | 0.0037  | -0.0026 | 0.0035 |
| 1:230287500 | 0.1668  | 0.0071  | 0.0104  | -0.0022 | -0.0017 | 0.0226 |
| 1:230292500 | 0.1560  | 0.0210  | -0.0069 | 0.0056  | -0.0062 | 0.0163 |
| 1:230297500 | 0.1798  | 0.0000  | 0.0226  | 0.0125  | -0.0117 | 0.0252 |
| 1:230302500 | 0.1573  | 0.0130  | 0.0092  | 0.0083  | -0.0068 | 0.0268 |
| 1:230307500 | 0.0926  | 0.0312  | 0.0235  | 0.0183  | -0.0159 | 0.0683 |
| 1:230312500 | 0.1256  | 0.0171  | 0.0976  | 0.0383  | -0.0263 | 0.1379 |
| 1:230317500 | 0.1402  | 0.0480  | 0.0706  | 0.0069  | -0.0021 | 0.1262 |
| 1:230322500 | 0.0939  | 0.0408  | 0.0322  | 0.0065  | -0.0036 | 0.0723 |
| 1:230327500 | -0.0206 | 0.1114  | 0.1420  | 0.0590  | -0.0450 | 0.2888 |
| 1:230332500 | -0.0087 | 0.0675  | 0.2056  | 0.0790  | -0.0541 | 0.3077 |
| 1:230337500 | -0.0300 | 0.0794  | 0.0931  | 0.0610  | -0.0464 | 0.2035 |
| 1:230342500 | -0.0712 | 0.1279  | 0.1705  | 0.1191  | -0.0942 | 0.3189 |
| 1:230347500 | -0.0212 | 0.1196  | 0.1470  | 0.1413  | -0.1092 | 0.3188 |
| 1:230352500 | -0.0226 | 0.0858  | 0.1197  | 0.1012  | -0.0777 | 0.2679 |
| 1:230357500 | -0.0440 | 0.1889  | 0.0914  | 0.1262  | -0.1007 | 0.3408 |

PBS': the modified PBS. HNA: highland Native American. CLM: Colombians from Medellin, Colombia. JPT: Japanese in Tokyo, Japan. CEU: Utah Residents with Northern and Western European Ancestry

<sup>a</sup> Chromosomal position in the middle of sliding window (NCBI build GRCh37)

**Table S11.** PBS' in a ~436.3 kb genomic region located 1 Mb downstream of *EGLN1* (a sliding window with 5 kb windows and 5 kb steps), calculated using the estimated allele frequency data for two population triplets (HNA, CLM, and JPT or CEU)

| Position <sup>a</sup> | CLM-HNA-JPT         |                     |                     | CLM-HNA-CEU         |                     |                     |
|-----------------------|---------------------|---------------------|---------------------|---------------------|---------------------|---------------------|
|                       | PBS' <sub>JPT</sub> | PBS' <sub>CLM</sub> | PBS' <sub>HNA</sub> | PBS' <sub>CEU</sub> | PBS' <sub>CLM</sub> | PBS' <sub>HNA</sub> |
| 1:233742500           | -0.0050             | 0.0274              | 0.0256              | -0.0031             | 0.0029              | 0.0651              |
| 1:233747500           | 0.0013              | 0.0396              | 0.0274              | 0.0120              | 0.0004              | 0.0863              |
| 1:233752500           | -0.0001             | 0.0186              | 0.0832              | 0.0139              | 0.0121              | 0.1289              |
| 1:233757500           | 0.0407              | -0.0123             | 0.0323              | 0.0170              | -0.0040             | 0.0321              |
| 1:233762500           | 0.0515              | 0.0009              | 0.0259              | 0.0522              | -0.0118             | 0.0284              |
| 1:233767500           | 0.0589              | 0.0091              | 0.0209              | 0.0302              | 0.0009              | 0.0342              |
| 1:233772500           | 0.0392              | -0.0156             | 0.1185              | 0.0555              | -0.0376             | 0.1240              |
| 1:233777500           | 0.0316              | -0.0165             | 0.0593              | 0.0409              | -0.0186             | 0.0757              |
| 1:233782500           | 0.0392              | -0.0282             | 0.0681              | 0.0297              | -0.0076             | 0.0632              |
| 1:233787500           | 0.0152              | -0.0122             | 0.0683              | 0.0359              | -0.0117             | 0.0914              |
| 1:233792500           | 0.0186              | -0.0069             | 0.0730              | 0.0180              | 0.0076              | 0.0750              |
| 1:233797500           | 0.0234              | -0.0009             | 0.0143              | 0.0264              | -0.0026             | 0.0254              |
| 1:233802500           | 0.0142              | -0.0033             | 0.0184              | 0.0608              | -0.0265             | 0.0467              |
| 1:233807500           | 0.0119              | 0.0116              | 0.0049              | 0.0346              | 0.0006              | 0.0183              |
| 1:233812500           | 0.0246              | 0.0027              | 0.0295              | 0.0289              | -0.0134             | 0.0513              |
| 1:233817500           | 0.0332              | 0.0022              | 0.0114              | 0.0363              | -0.0128             | 0.0347              |
| 1:233822500           | 0.0287              | 0.0072              | 0.0131              | 0.0198              | 0.0093              | 0.0154              |
| 1:233827500           | 0.0406              | -0.0108             | 0.0176              | 0.0475              | -0.0127             | 0.0286              |
| 1:233832500           | 0.0276              | 0.0118              | 0.0081              | 0.0060              | 0.0003              | 0.0247              |
| 1:233837500           | 0.0020              | 0.0083              | 0.0221              | 0.0705              | -0.0056             | 0.0335              |
| 1:233842500           | 0.0144              | 0.0036              | 0.0180              | 0.0811              | -0.0138             | 0.0463              |
| 1:233847500           | 0.0533              | -0.0275             | 0.2327              | 0.0350              | -0.0052             | 0.2836              |
| 1:233852500           | 0.0083              | 0.0053              | 0.0526              | 0.0771              | -0.0278             | 0.0857              |
| 1:233857500           | 0.0187              | 0.0059              | 0.0323              | 0.0645              | -0.0123             | 0.0527              |
| 1:233862500           | -0.0023             | 0.0154              | 0.0378              | 0.0793              | -0.0167             | 0.0783              |
| 1:233867500           | 0.0293              | 0.0116              | 0.0460              | 0.0148              | 0.0034              | 0.0573              |
| 1:233872500           | 0.0822              | -0.0132             | 0.0589              | 0.0086              | -0.0062             | 0.0556              |
| 1:233877500           | 0.0276              | 0.0455              | 0.0114              | 0.0437              | -0.0179             | 0.0838              |
| 1:233882500           | 0.0420              | 0.0157              | 0.0163              | 0.0324              | -0.0148             | 0.0561              |
| 1:233887500           | 0.0423              | 0.0131              | 0.0388              | 0.0348              | -0.0042             | 0.0527              |
| 1:233892500           | 0.0461              | 0.0014              | 0.0266              | 0.0389              | -0.0187             | 0.0553              |
| 1:233897500           | 0.0489              | -0.0219             | 0.0729              | 0.0355              | -0.0263             | 0.0731              |
| 1:233902500           | 0.0450              | -0.0202             | 0.0872              | 0.0529              | -0.0324             | 0.0903              |
| 1:233907500           | 0.0443              | -0.0313             | 0.1082              | 0.0426              | -0.0299             | 0.1214              |
| 1:233912500           | 0.0479              | -0.0230             | 0.0792              | 0.0347              | -0.0290             | 0.0950              |
| 1:233917500           | -0.0041             | -0.0006             | 0.0319              | 0.0126              | -0.0112             | 0.0494              |
| 1:233922500           | 0.0207              | -0.0090             | 0.0617              | 0.0289              | -0.0160             | 0.0790              |
| 1:233927500           | -0.0016             | 0.0795              | 0.0304              | 0.0268              | -0.0021             | 0.1212              |
| 1:233932500           | 0.0351              | 0.0091              | 0.0302              | 0.0118              | -0.0114             | 0.0662              |
| 1:233937500           | 0.0169              | 0.1043              | -0.0108             | 0.0344              | -0.0046             | 0.1045              |
| 1:233942500           | 0.0393              | 0.0651              | 0.0038              | 0.0363              | -0.0129             | 0.0929              |
| 1:233947500           | 0.0220              | 0.0409              | 0.0111              | 0.0548              | -0.0194             | 0.0800              |
| 1:233952500           | 0.0022              | 0.0269              | 0.0080              | 0.0729              | -0.0187             | 0.0610              |
| 1:233957500           | 0.0125              | 0.0029              | 0.0179              | 0.0811              | 0.0049              | 0.0251              |

|             |         |         |         |        |         |        |
|-------------|---------|---------|---------|--------|---------|--------|
| 1:233962500 | 0.0094  | -0.0047 | 0.0197  | 0.0893 | -0.0034 | 0.0186 |
| 1:233967500 | 0.0013  | -0.0004 | 0.0137  | 0.0955 | 0.0022  | 0.0158 |
| 1:233972500 | 0.0228  | 0.0017  | 0.0098  | 0.0731 | 0.0086  | 0.0140 |
| 1:233977500 | 0.0347  | -0.0009 | 0.0229  | 0.0665 | 0.0019  | 0.0257 |
| 1:233982500 | 0.0343  | 0.0015  | 0.0233  | 0.0149 | -0.0012 | 0.0447 |
| 1:233987500 | 0.0397  | -0.0145 | 0.0359  | 0.0679 | 0.0028  | 0.0283 |
| 1:233992500 | 0.0647  | -0.0427 | 0.0869  | 0.1434 | -0.0619 | 0.1350 |
| 1:233997500 | 0.0564  | -0.0232 | 0.0567  | 0.1511 | -0.0407 | 0.0810 |
| 1:234002500 | 0.0801  | -0.0380 | 0.0864  | 0.1720 | -0.0357 | 0.0837 |
| 1:234007500 | 0.0722  | -0.0341 | 0.0848  | 0.1373 | 0.0030  | 0.0405 |
| 1:234012500 | 0.0202  | -0.0076 | 0.0165  | 0.0974 | 0.0125  | 0.0159 |
| 1:234017500 | 0.0425  | -0.0031 | 0.0185  | 0.0752 | -0.0067 | 0.0257 |
| 1:234022500 | 0.0059  | 0.0004  | 0.0278  | 0.1050 | -0.0117 | 0.0422 |
| 1:234027500 | 0.0328  | -0.0125 | 0.0303  | 0.0557 | -0.0088 | 0.0250 |
| 1:234032500 | 0.0201  | -0.0119 | 0.0618  | 0.1061 | -0.0366 | 0.1030 |
| 1:234037500 | 0.0343  | -0.0177 | 0.0803  | 0.1203 | -0.0143 | 0.0791 |
| 1:234042500 | 0.0371  | -0.0170 | 0.0945  | 0.1115 | -0.0342 | 0.0949 |
| 1:234047500 | 0.0084  | 0.0255  | 0.0546  | 0.0642 | -0.0182 | 0.0965 |
| 1:234052500 | -0.0025 | 0.0099  | 0.1075  | 0.0621 | -0.0247 | 0.1565 |
| 1:234057500 | 0.0110  | -0.0121 | 0.2027  | 0.0525 | -0.0082 | 0.2090 |
| 1:234062500 | -0.0092 | 0.0059  | 0.1325  | 0.0505 | -0.0093 | 0.1498 |
| 1:234067500 | 0.0068  | -0.0106 | 0.1418  | 0.0763 | -0.0264 | 0.1530 |
| 1:234072500 | -0.0057 | 0.0104  | 0.1374  | 0.0527 | -0.0110 | 0.1658 |
| 1:234077500 | 0.0271  | -0.0182 | 0.1170  | 0.0523 | -0.0198 | 0.1564 |
| 1:234082500 | 0.0308  | -0.0258 | 0.0997  | 0.0594 | -0.0249 | 0.1111 |
| 1:234087500 | 0.0147  | -0.0047 | 0.0091  | 0.0700 | -0.0295 | 0.0388 |
| 1:234092500 | -0.0006 | 0.0111  | 0.0157  | 0.0128 | -0.0071 | 0.0256 |
| 1:234097500 | -0.0142 | 0.0394  | 0.0383  | 0.0009 | 0.0047  | 0.0870 |
| 1:234102500 | -0.0186 | 0.0467  | 0.0358  | 0.0005 | 0.0070  | 0.0779 |
| 1:234107500 | 0.0098  | 0.0199  | -0.0053 | 0.0151 | -0.0043 | 0.0167 |
| 1:234112500 | 0.0058  | 0.0210  | 0.0036  | 0.0294 | -0.0011 | 0.0386 |
| 1:234117500 | -0.0025 | 0.0257  | 0.0391  | 0.0195 | -0.0077 | 0.0740 |
| 1:234122500 | 0.0146  | 0.0252  | 0.0201  | 0.0200 | -0.0108 | 0.0739 |
| 1:234127500 | 0.0215  | 0.0589  | -0.0121 | 0.0154 | -0.0094 | 0.0658 |
| 1:234132500 | -0.0006 | 0.0764  | 0.0075  | 0.0105 | -0.0068 | 0.0967 |
| 1:234137500 | -0.0030 | 0.0722  | 0.0380  | 0.0376 | -0.0007 | 0.1205 |
| 1:234142500 | -0.0271 | 0.0639  | 0.0637  | 0.0593 | -0.0377 | 0.1522 |
| 1:234147500 | -0.0055 | 0.0598  | 0.0073  | 0.0276 | -0.0138 | 0.1016 |
| 1:234152500 | 0.0055  | 0.0125  | 0.0305  | 0.0588 | -0.0391 | 0.0969 |
| 1:234157500 | 0.0001  | 0.0001  | 0.0315  | 0.0262 | -0.0123 | 0.0639 |
| 1:234162500 | -0.0239 | 0.0468  | 0.0585  | 0.0883 | -0.0386 | 0.1358 |
| 1:234167500 | -0.0267 | 0.0454  | 0.0567  | 0.0409 | -0.0272 | 0.1350 |

PBS': the modified PBS. HNA: highland Native American. CLM: Colombians from Medellin, Colombia. JPT: Japanese in Tokyo, Japan. CEU: Utah Residents with Northern and Western European Ancestry

<sup>a</sup> Chromosomal position in the middle of sliding window (NCBI build GRCh37)
