# Supplementary material for: Effect of EGLN1 Genetic Polymorphisms on Hemoglobin Concentration in Andean Highlanders
Source: Hindawi journal article supplement (doi:10.1155/2020/3436581), 2020-01-01
Supplement: f2 [file 3436581.f2.pdf]

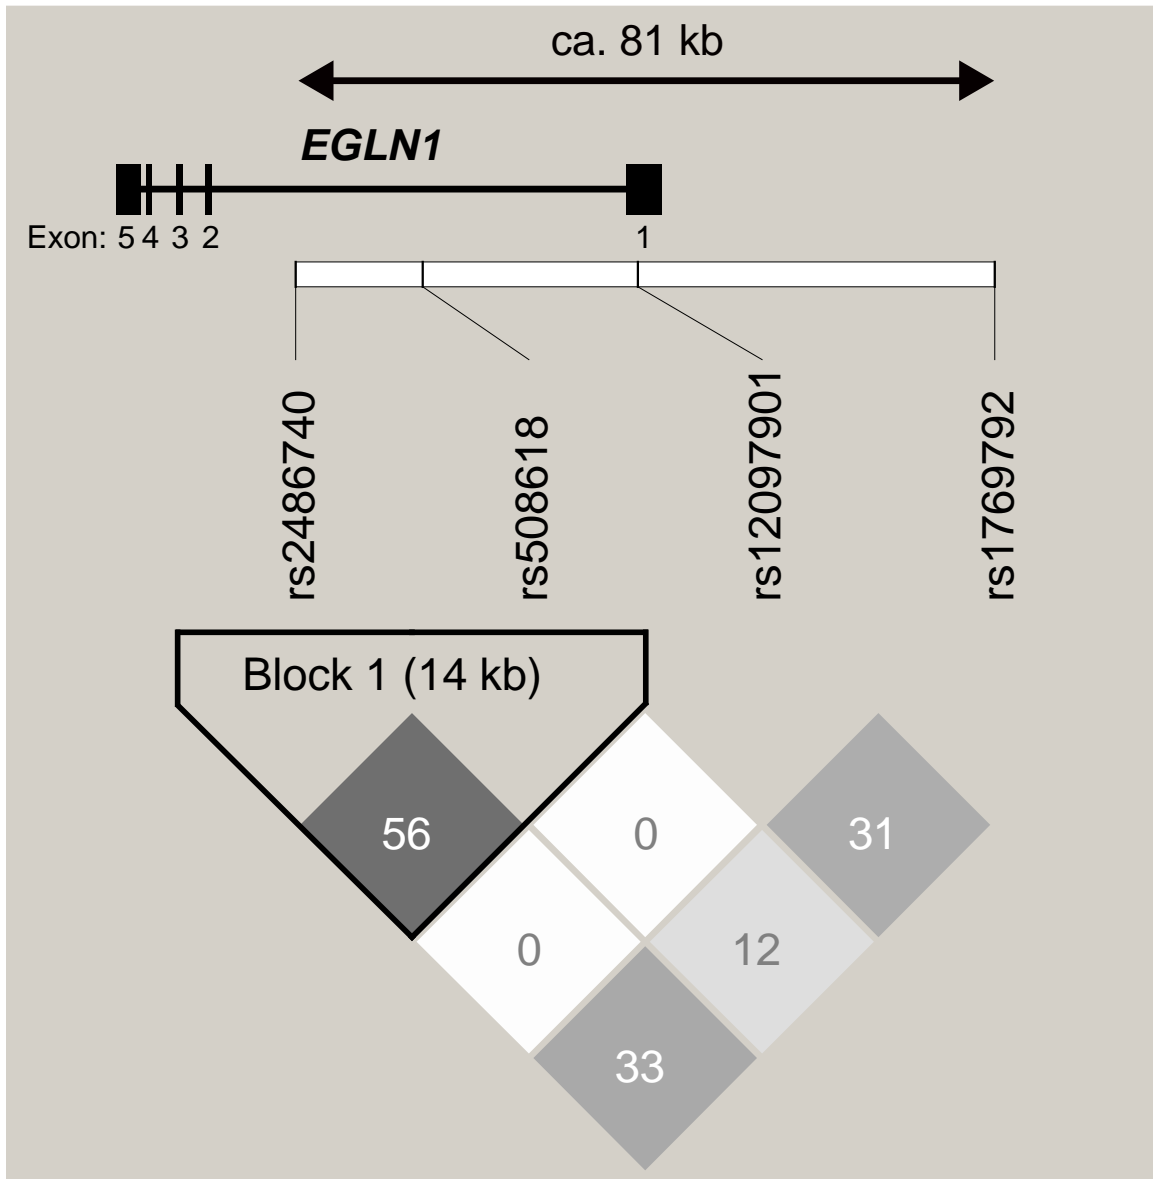

**Figure S1.** The physical position and linkage disequilibrium of four SNPs across a ~81 kb genomic region around *EGLN1* in 99 Bolivian highlanders. The diagram was created using Haploview ver. 4.2. Numbers in diamonds represent  $r^2$  values (×100).

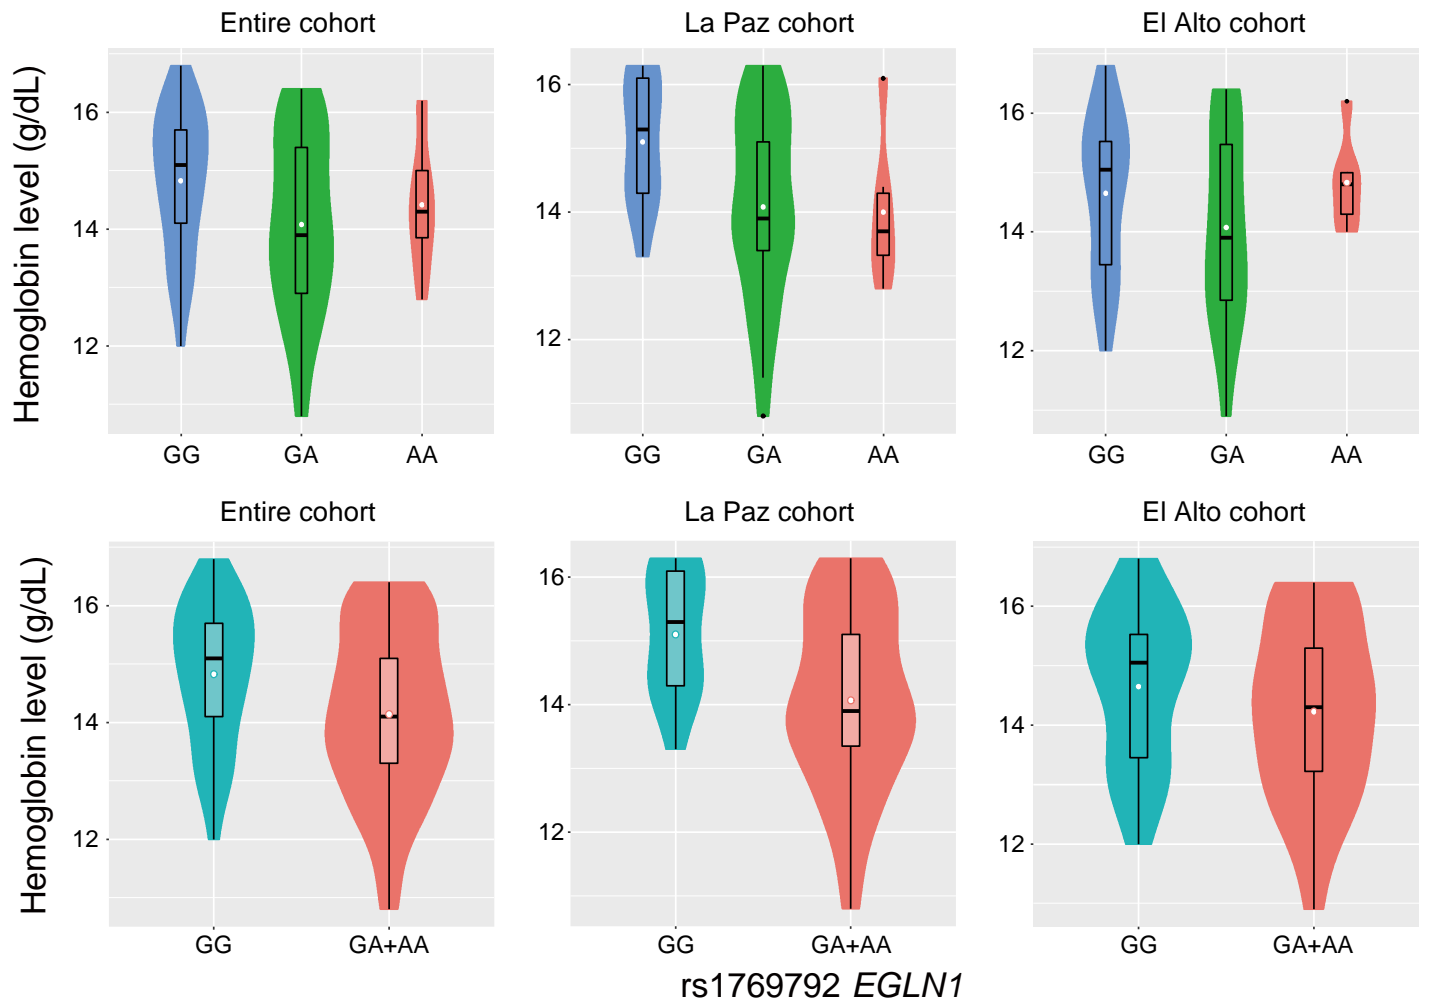

**Figure S2.** The estimated hemoglobin (Hb) concentrations (g/dL) in individuals with different *EGLN1* rs1769792 genotypes in La Paz, El Alto, and the entire cohort. White dots represent mean Hb concentration values and bold black bars represent median values.

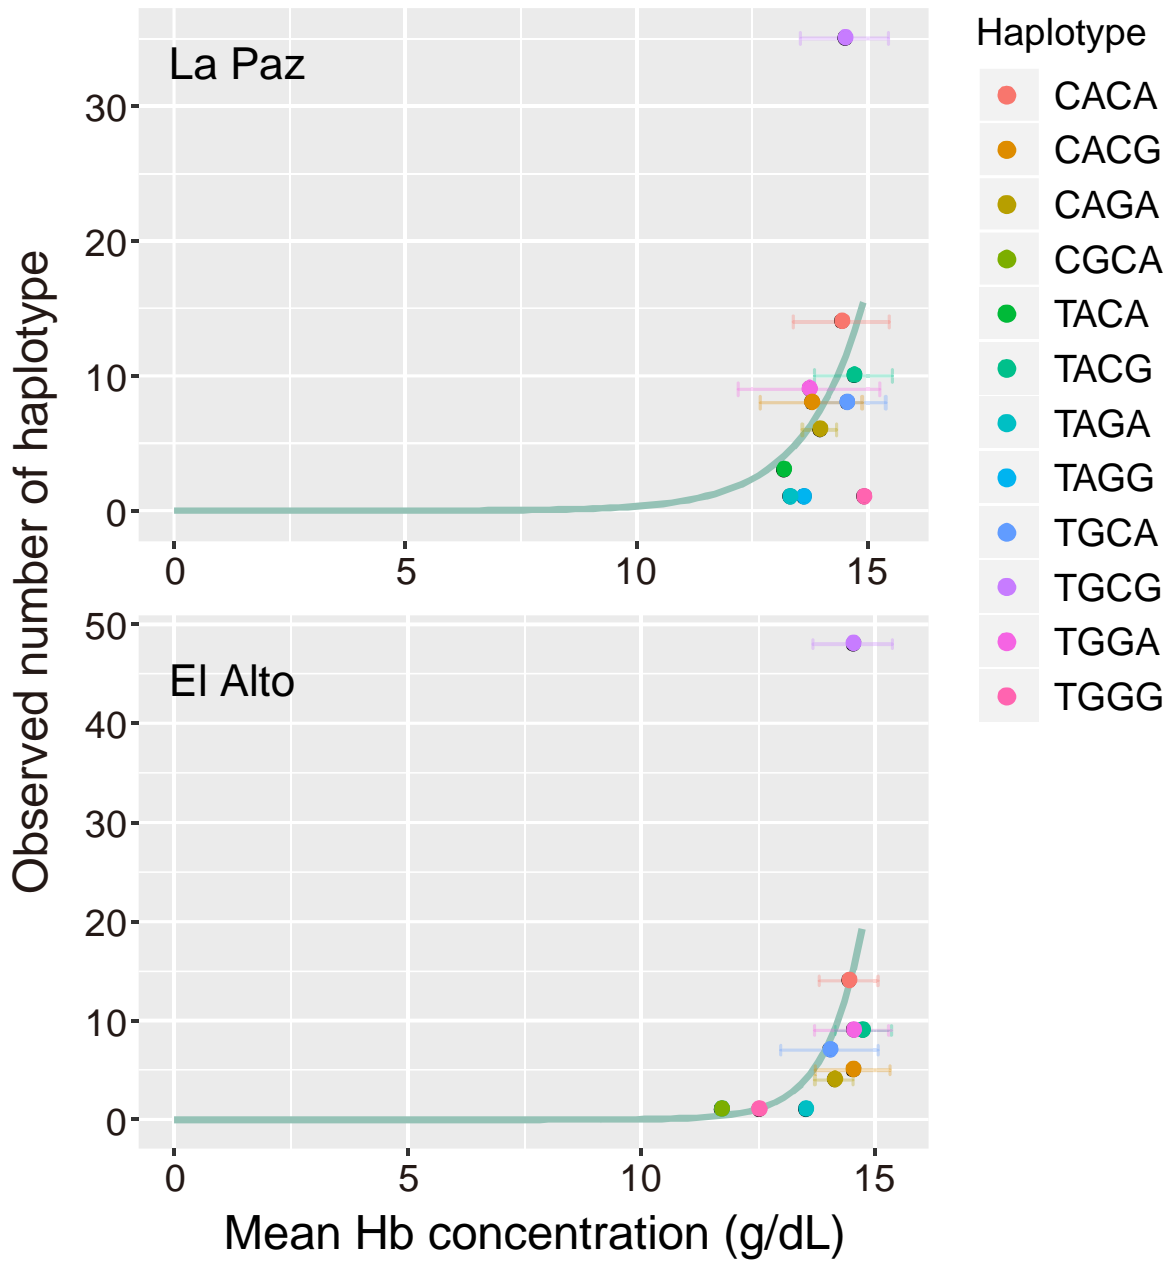

**Figure S3.** Relationship between the estimated hemoglobin (Hb) concentration (g/dL) and *EGLNI* haplotype frequency in the Bolivian cohorts. Hb levels are represented as the mean  $\pm$  standard deviation of the mean. The bold blue line represents the regression line. Different colored circles indicate different haplotypes estimated from four *EGLNI* SNPs (rs2486740, rs508618, rs12097901, and rs1769792).

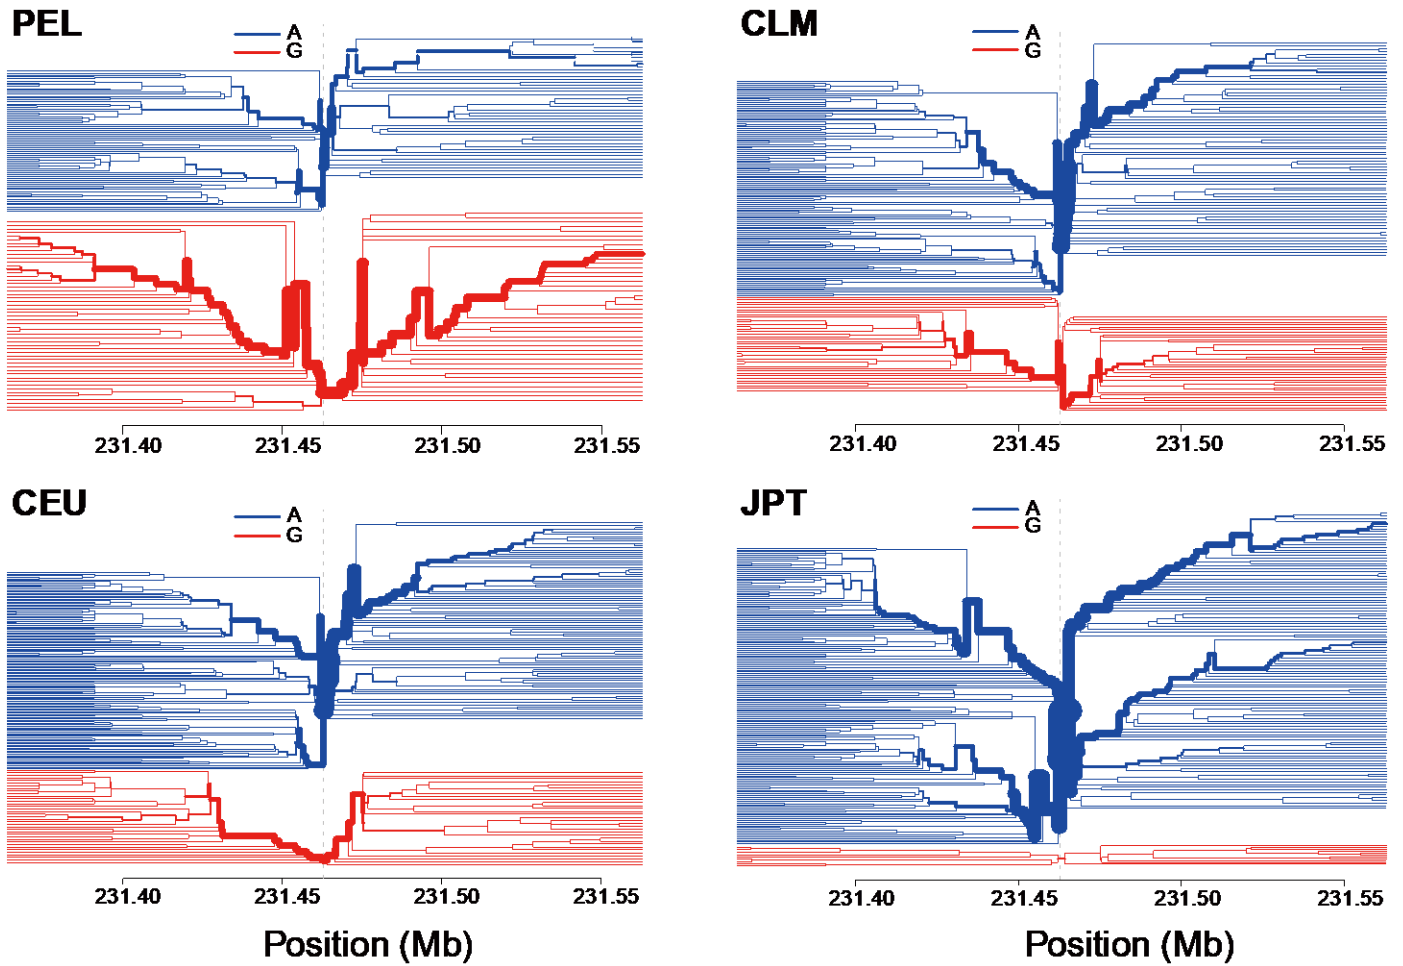

**Figure S4.** Haplotype bifurcation plots for a ~200 kb genomic region containing *EGLN1*. Vertical dashed line represents the position of the focal marker (rs1769792). The horizontal axis represents chromosomal position (NCBI build GRCh38). Line thickness represents the number of chromosomes with a haplotype. PEL: Peruvians from Lima, Peru. CLM: Colombians from Medellin, Colombia. CEU: Utah Residents with Northern and Western European Ancestry. JPT: Japanese in Tokyo, Japan.

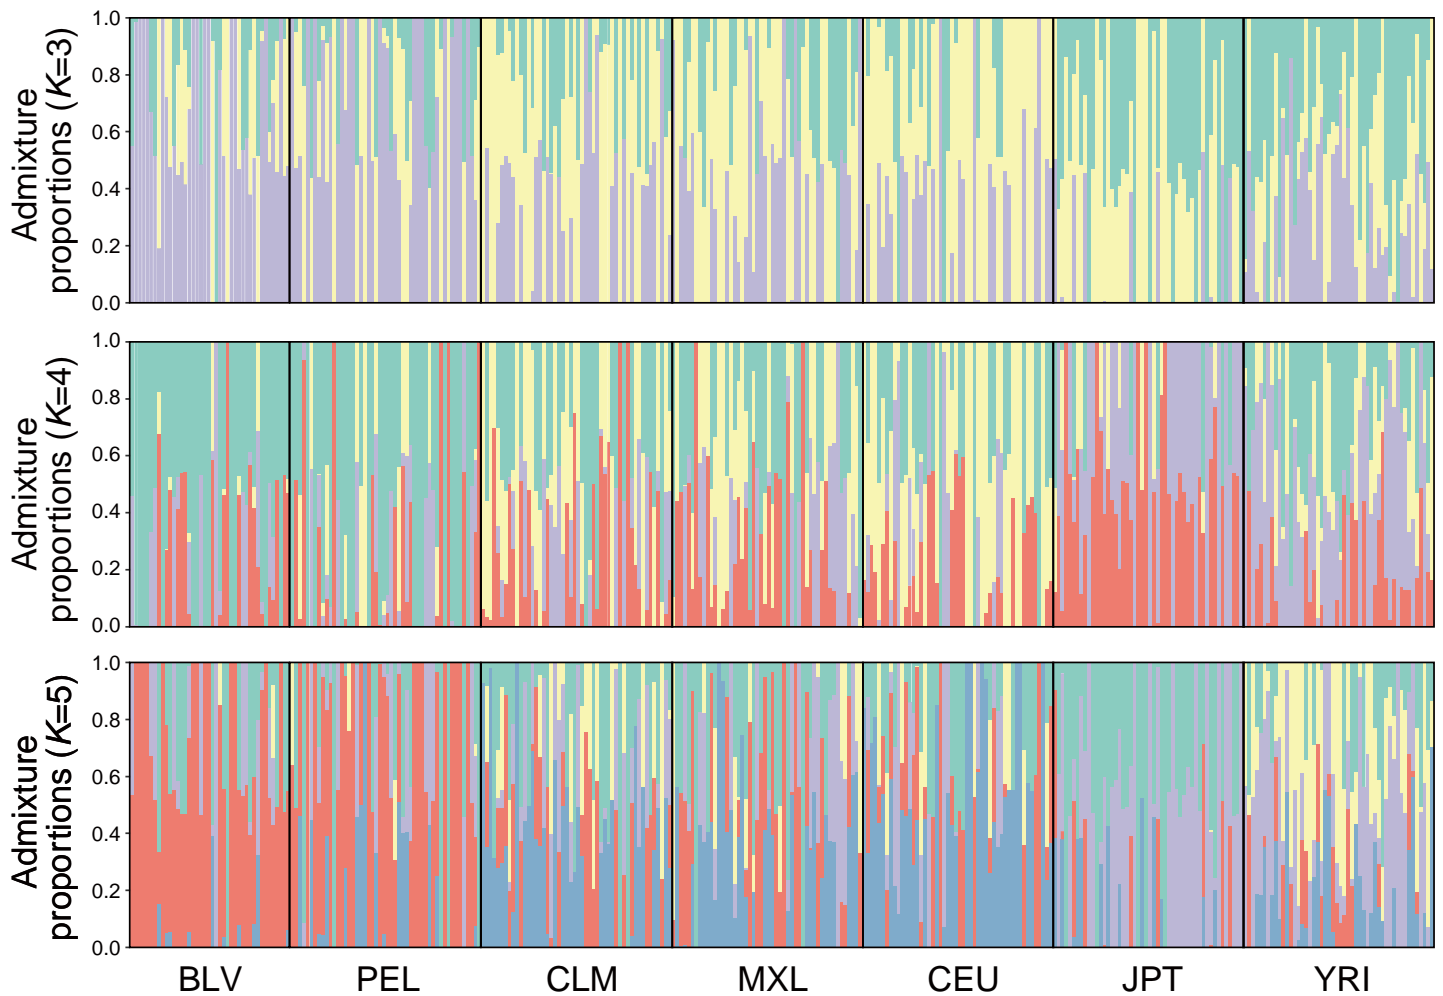

**Figure S5.** Genetic structure analysis of 342 individuals from BLV, PEL, CLM, MXL, CEU, JPT, and YRI populations.  $K$  indicates the number of putative ancestral populations. Colors represent proportions of genetic ancestry from the assumed ancestral population (admixture proportions). BLV: Bolivian from La Paz and El Alto, Bolivia. PEL: Peruvians from Lima, Peru. CLM: Colombians from Medellin, Colombia. MXL: Mexican Ancestry from Los Angeles USA. CEU: Utah Residents with Northern and Western European Ancestry. JPT: Japanese in Tokyo, Japan. YRI: Yoruba in Ibadan, Nigeria.
